# Supplementary material for: Why Rivers Disappear—Remote Sensing Analysis of Postmining Factors Using the Example of the Sztoła River, Poland
Source: MDPI journal article supplement (doi:10.3390/rs16010111), 2023-12-27

NMDI Soil Index  
Research area - May 28, 2017

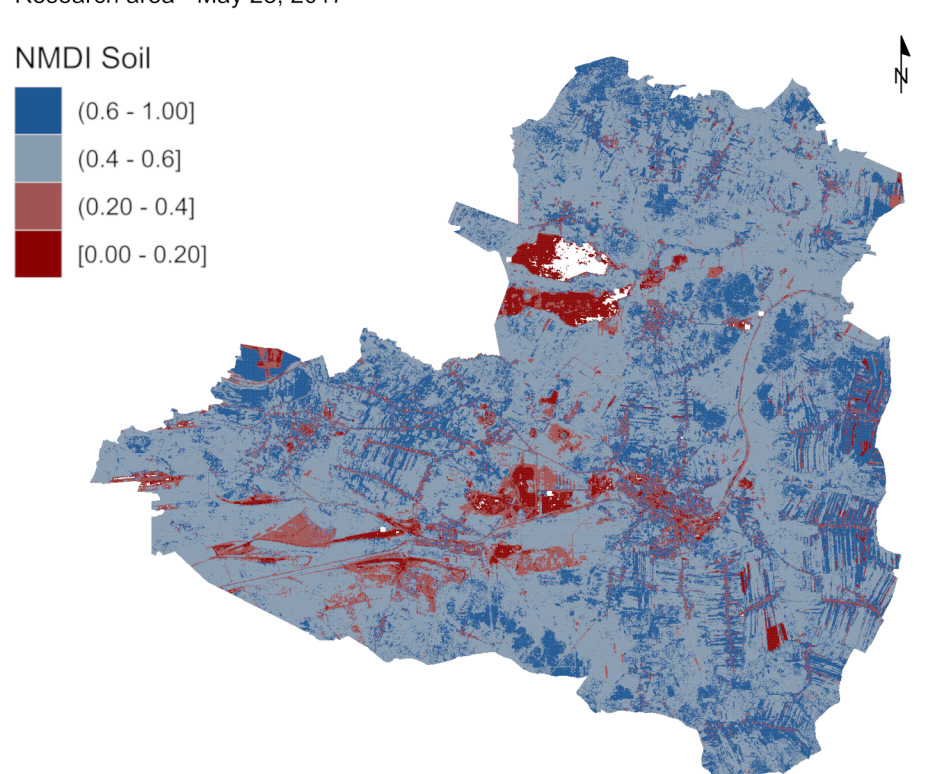

NMDI Soil Index  
Research area - August 21, 2017

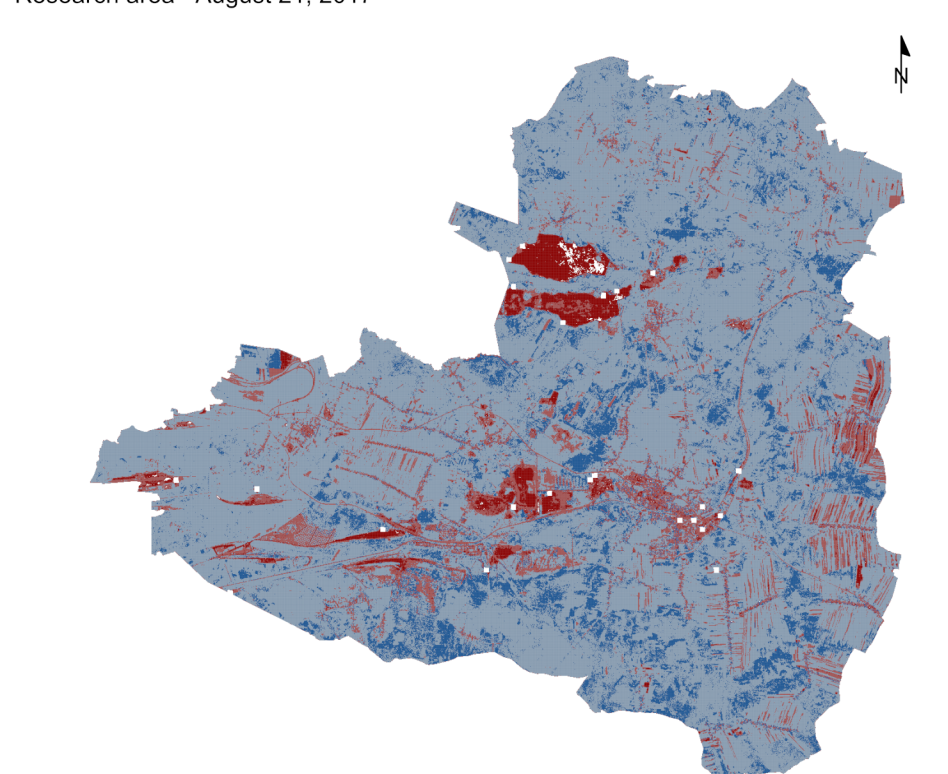

NMDI Soil Index  
Research area - May 13, 2018

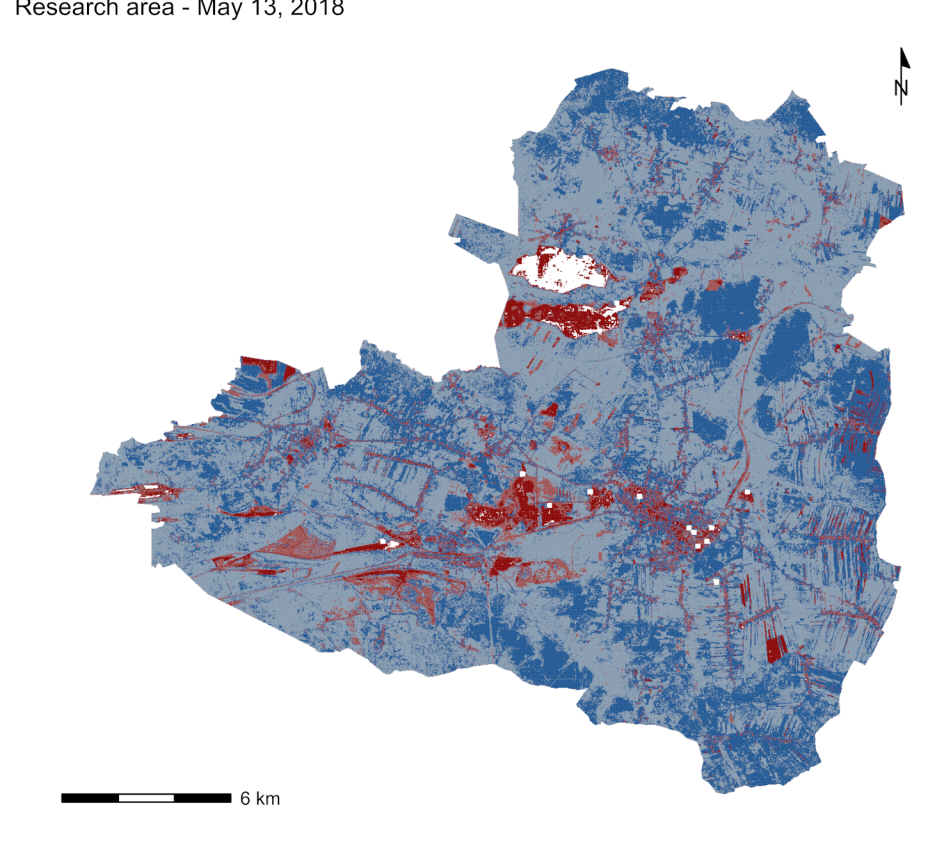

NMDI Soil Index  
Research area - August 23, 2018

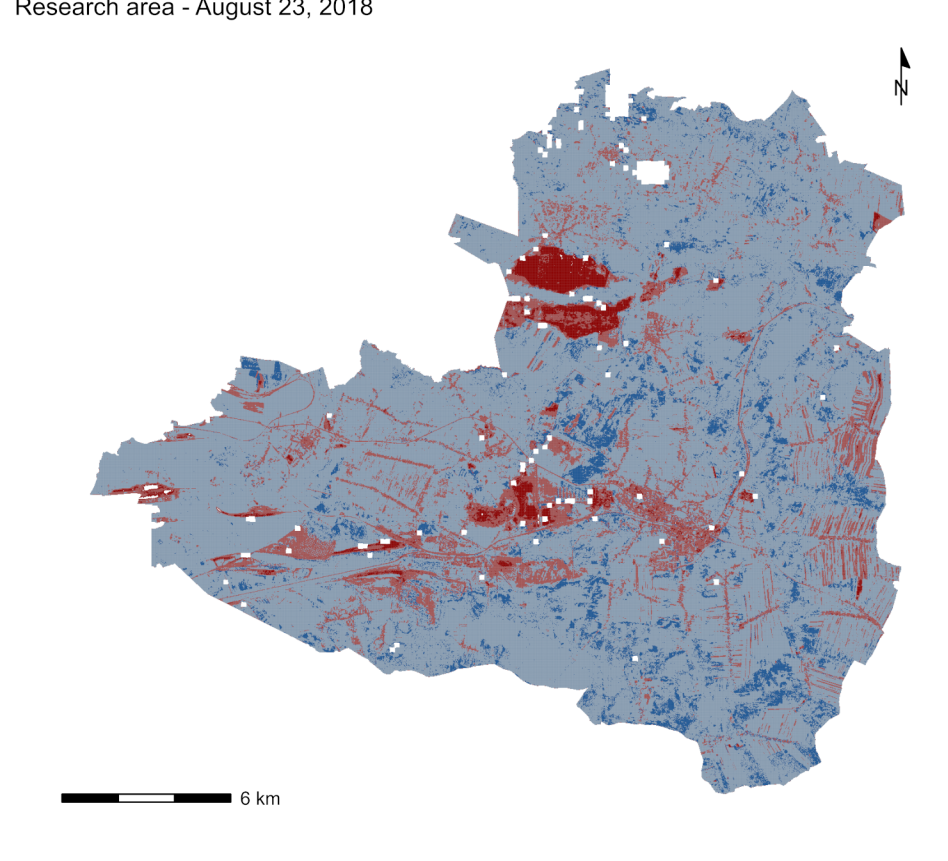

NMDI Soil Index  
Research area - May 25, 2019

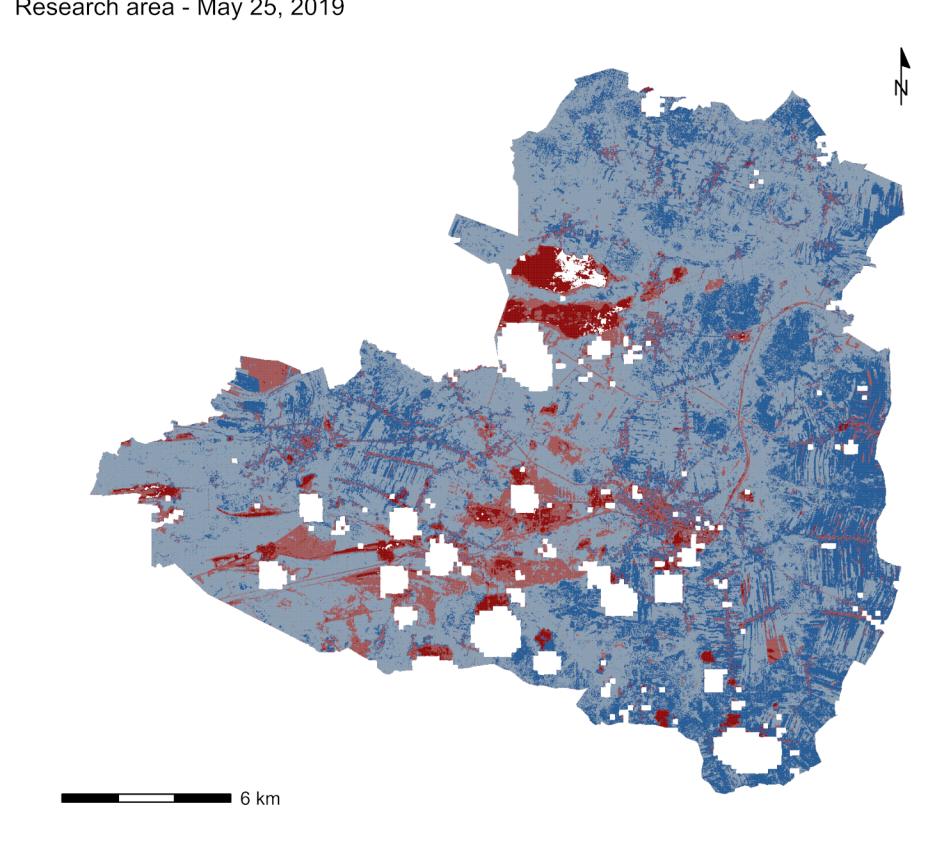

NMDI Soil Index  
Research area - August 31, 2019

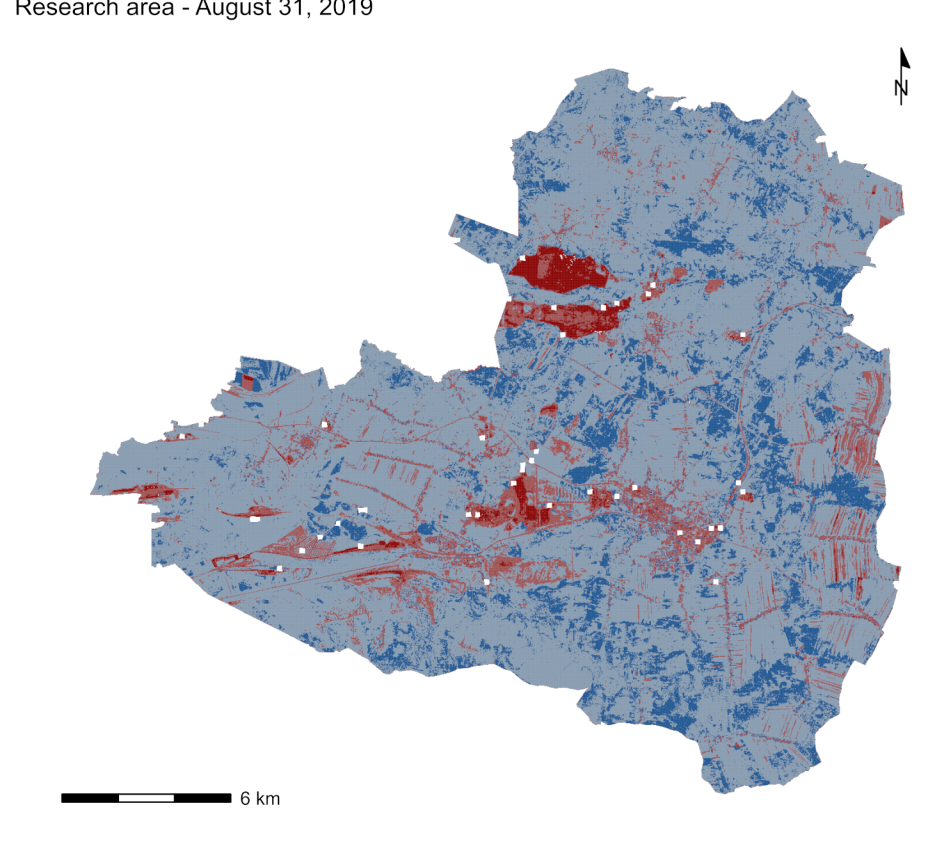

NMDI Soil Index  
Research area - May 9, 2020

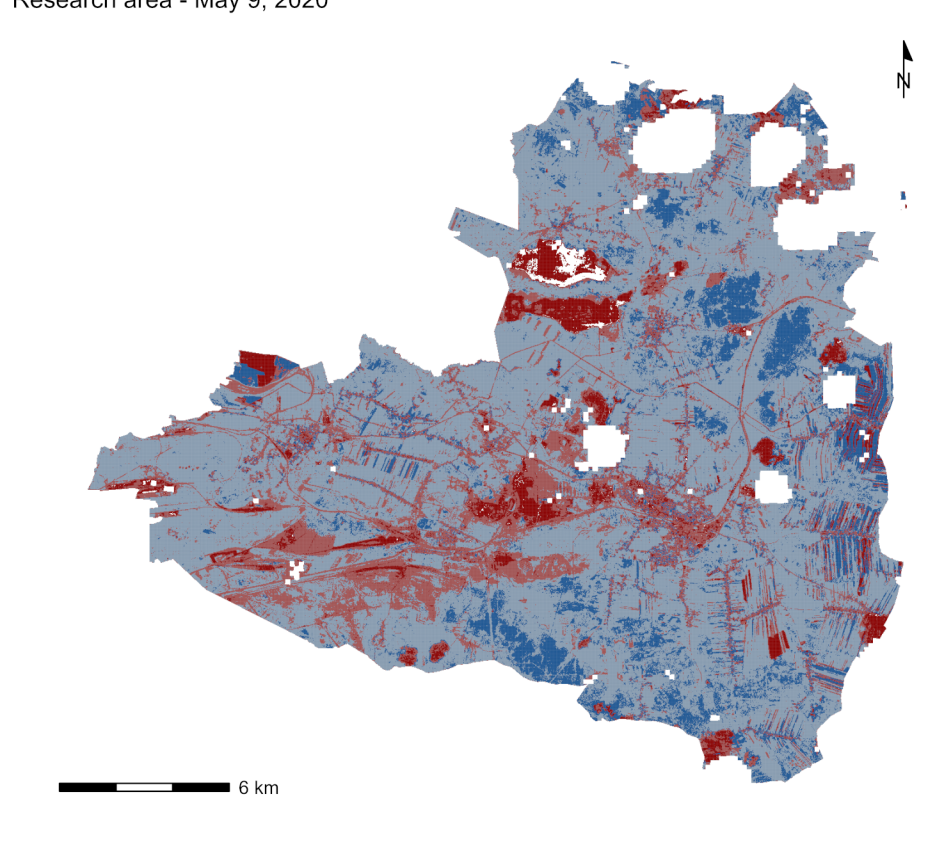

NMDI Soil Index  
Research area - August 22, 2020

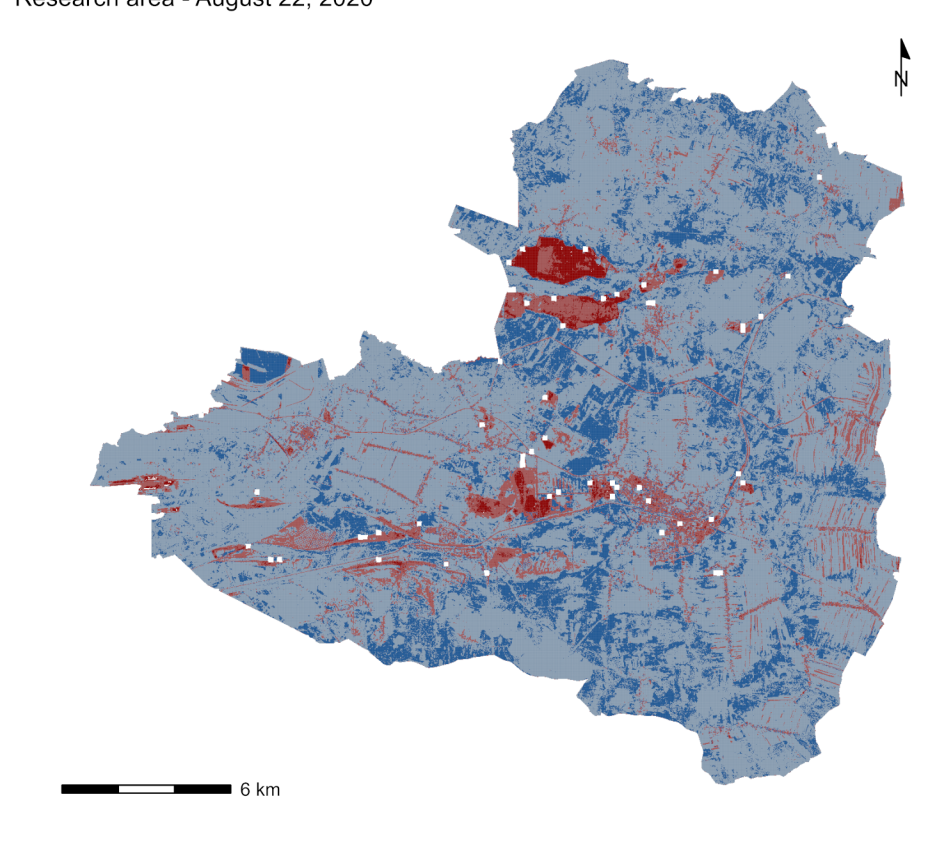

NMDI Soil Index  
Research area - May 9, 2021

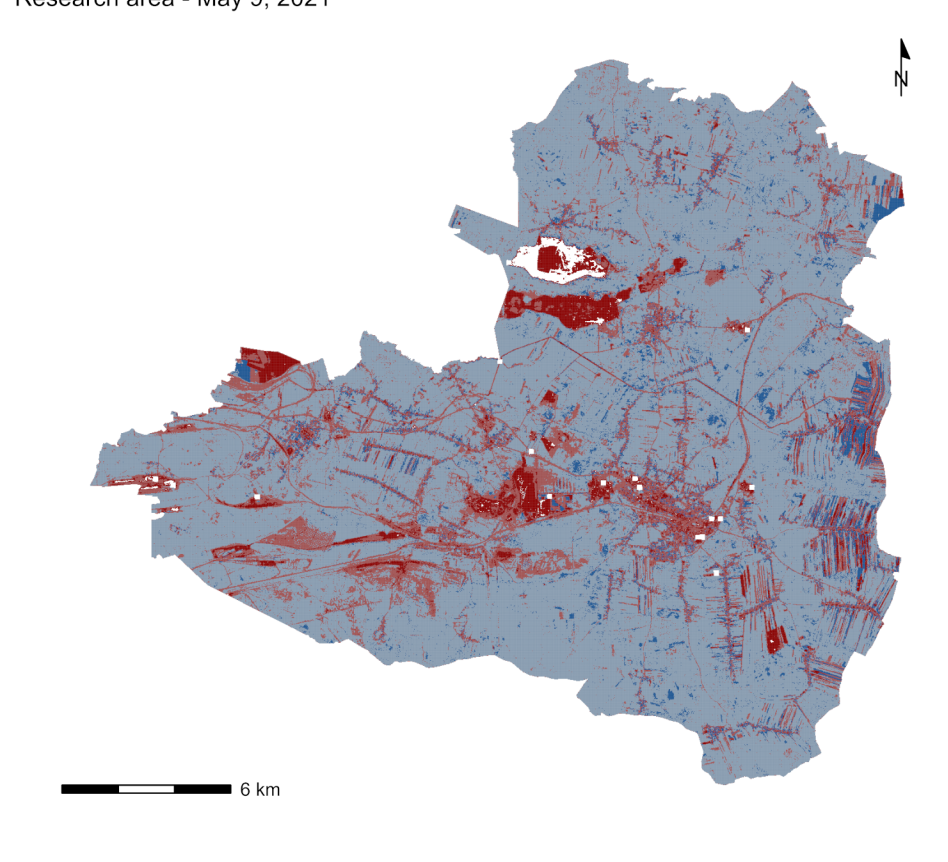

NMDI Soil Index  
Research area - August 15, 2021

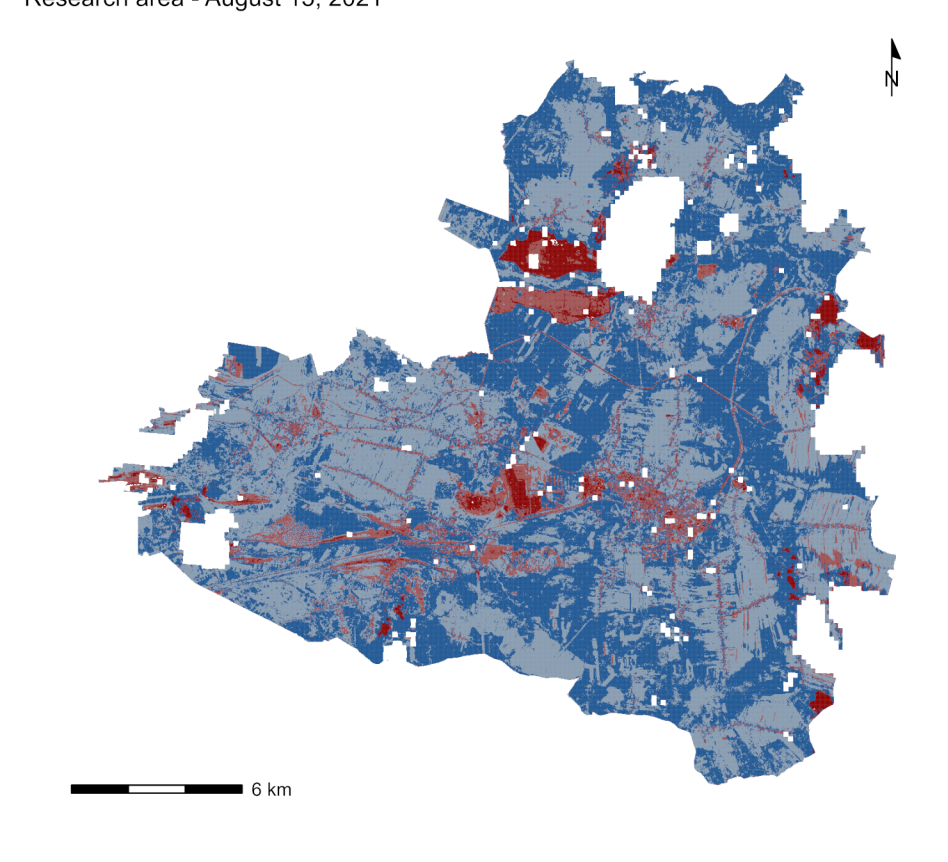

NMDI Soil Index  
Research area - May 19, 2022

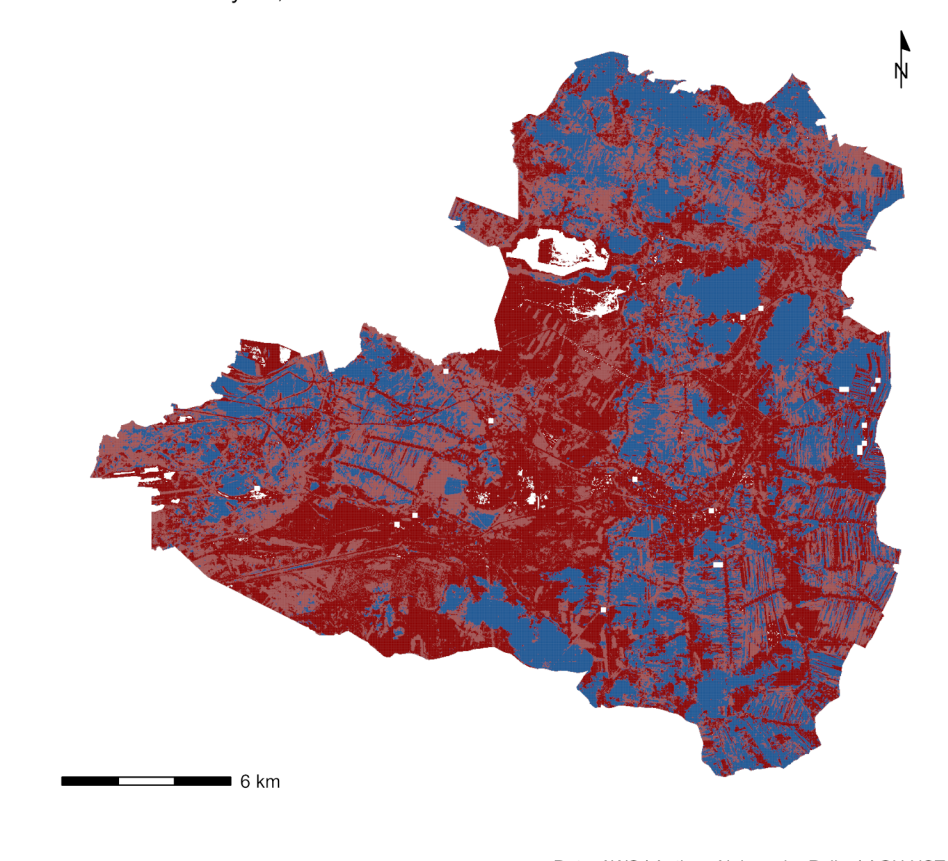

NMDI Soil Index  
Research area - August 25, 2022

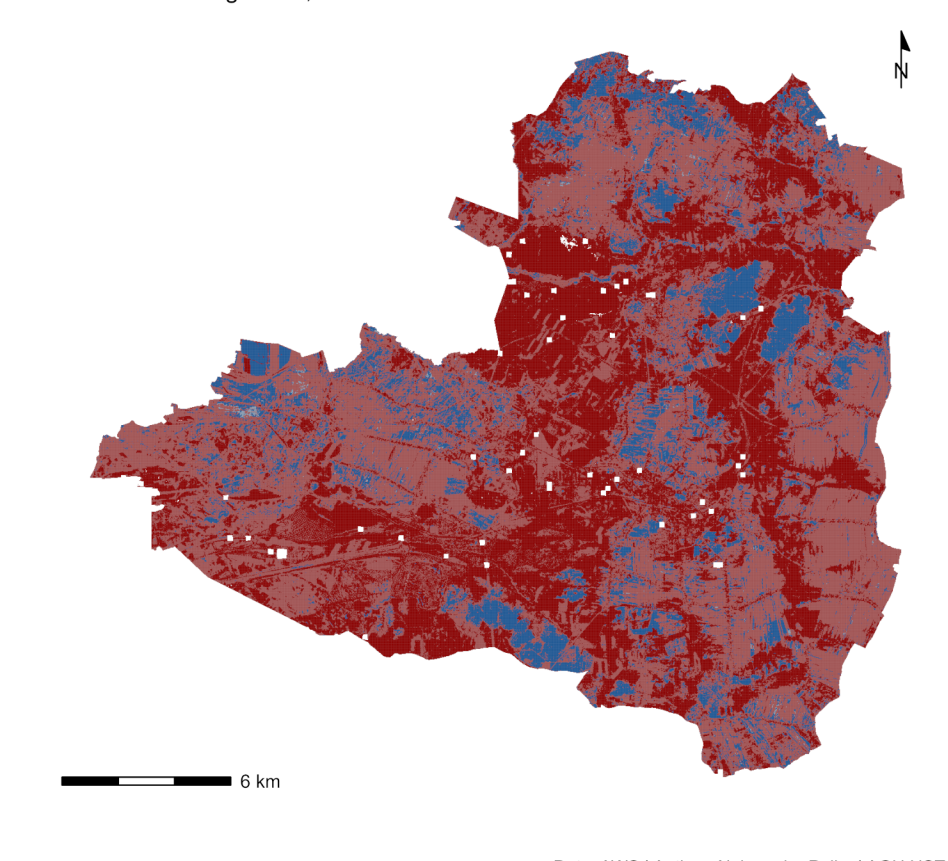

NMDI Soil Index  
Research area - May 27, 2023

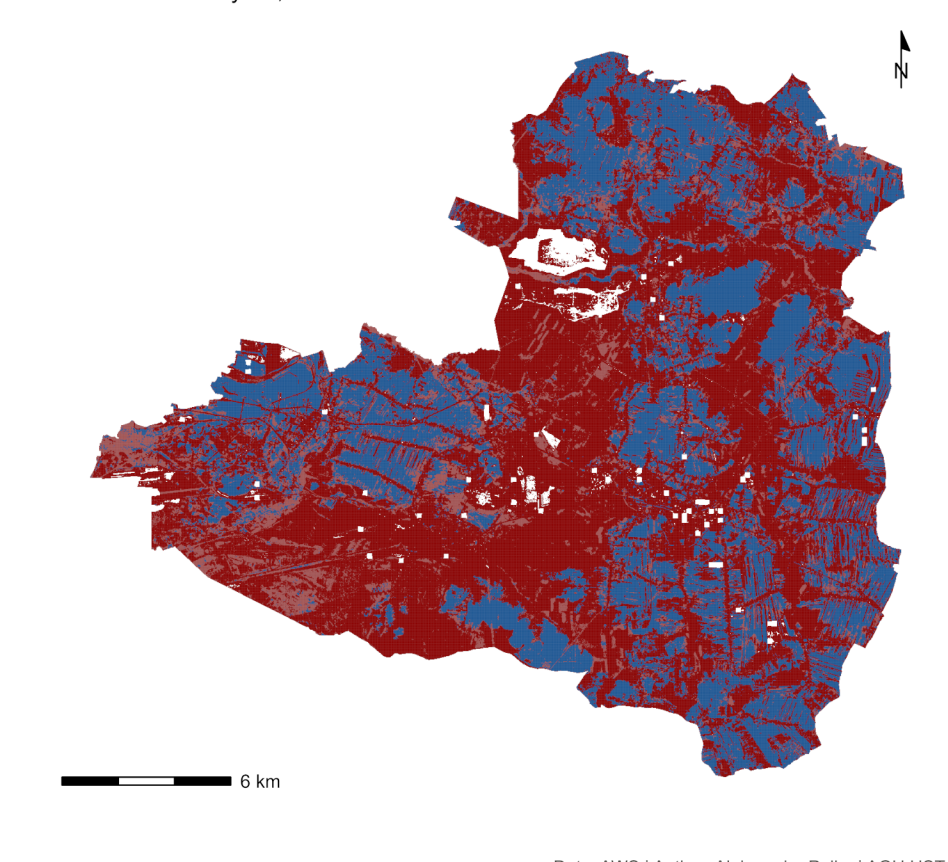

NMDI Soil Index  
Research area - August 15, 2023

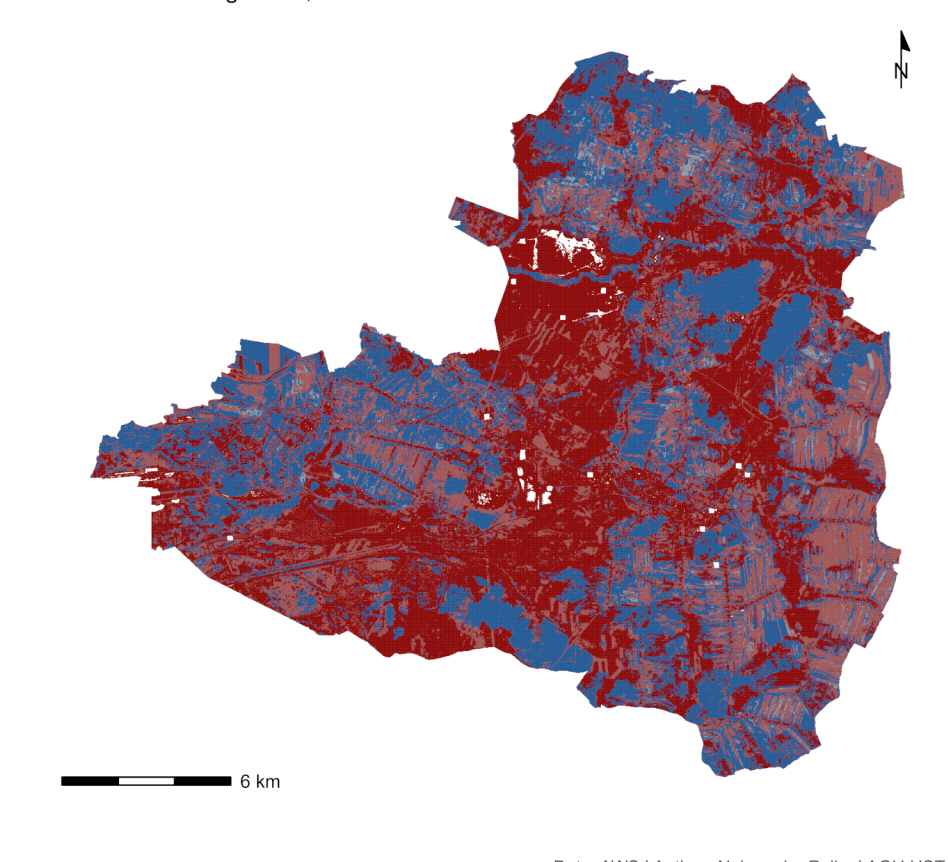

Supplement: s1 [file s1]
