# Supplementary figures and images for: Why Rivers Disappear—Remote Sensing Analysis of Postmining Factors Using the Example of the Sztoła River, Poland
Source: MDPI journal article supplement (doi:10.3390/rs16010111), 2023-12-27

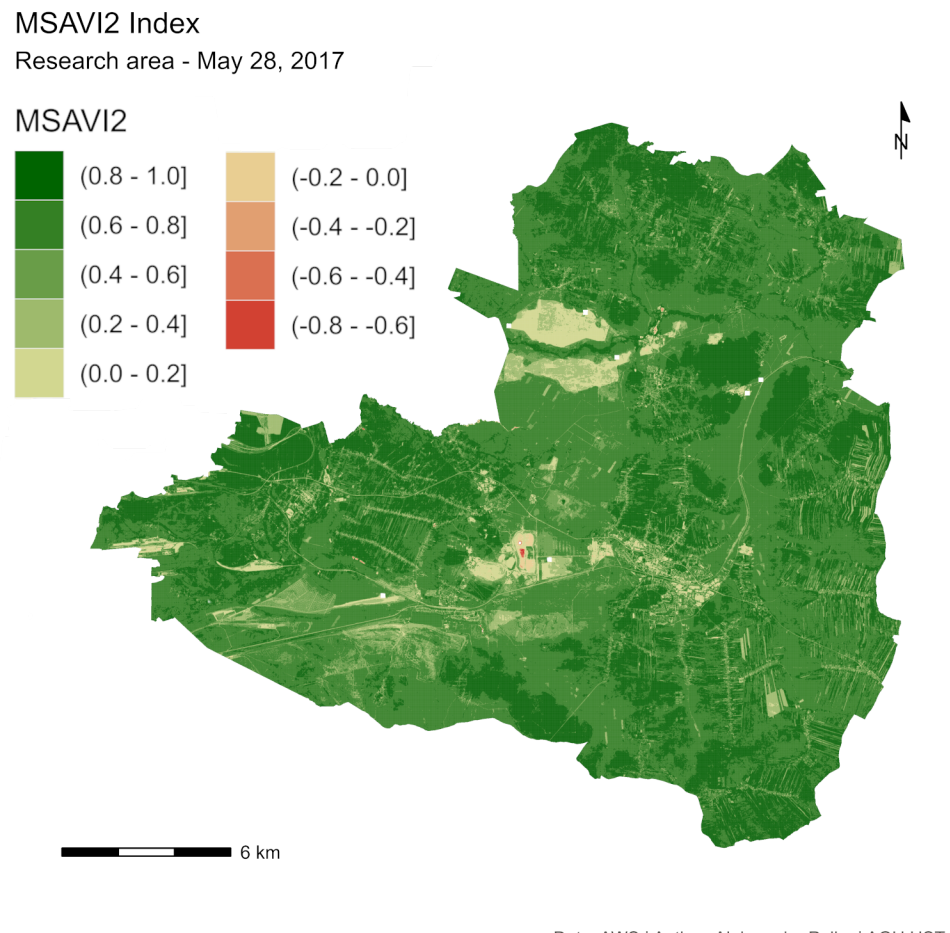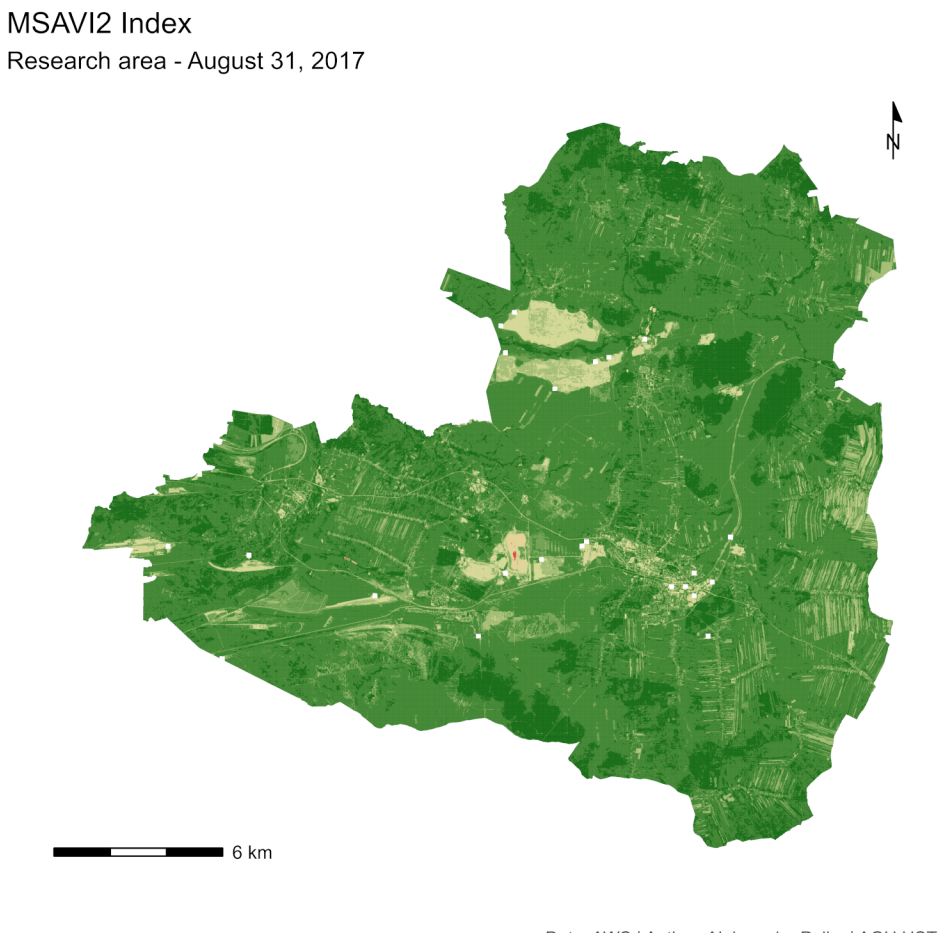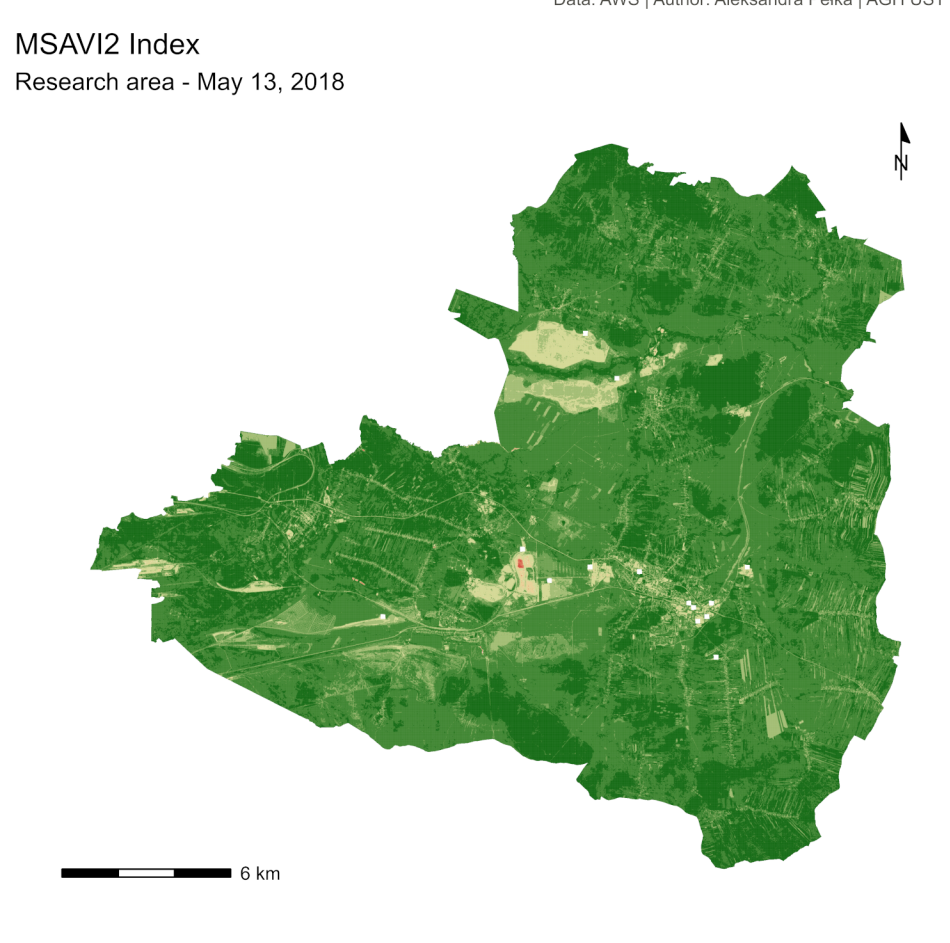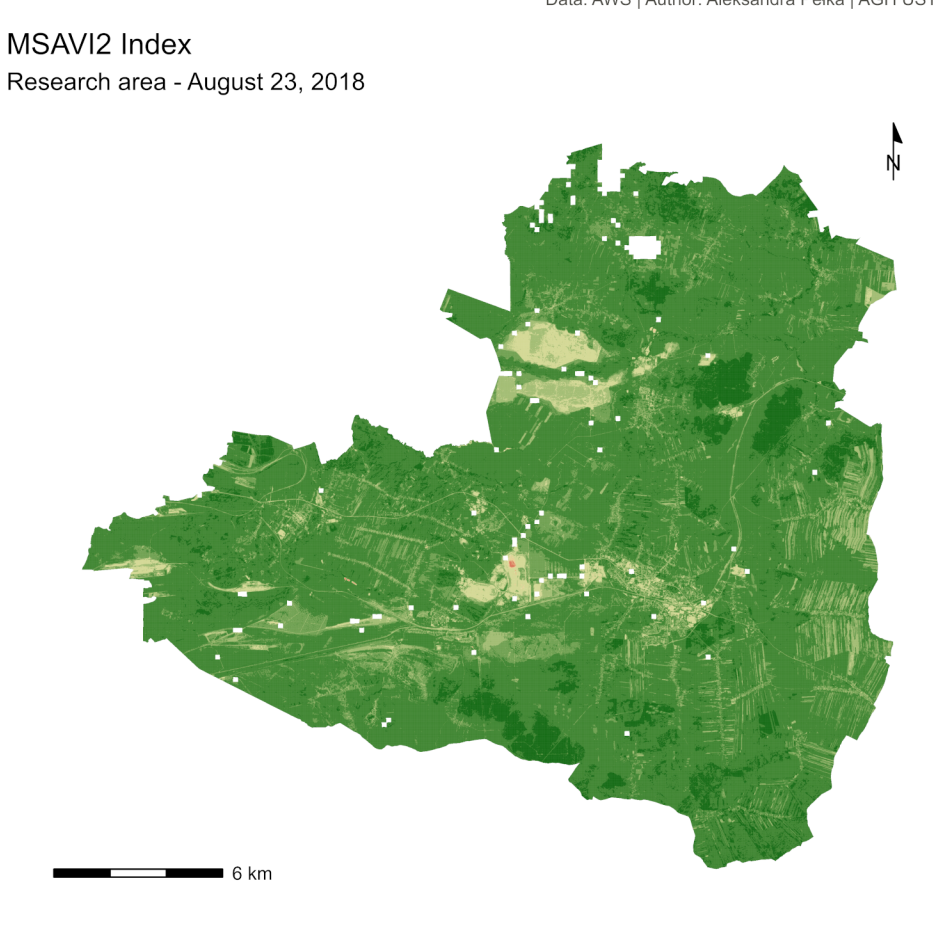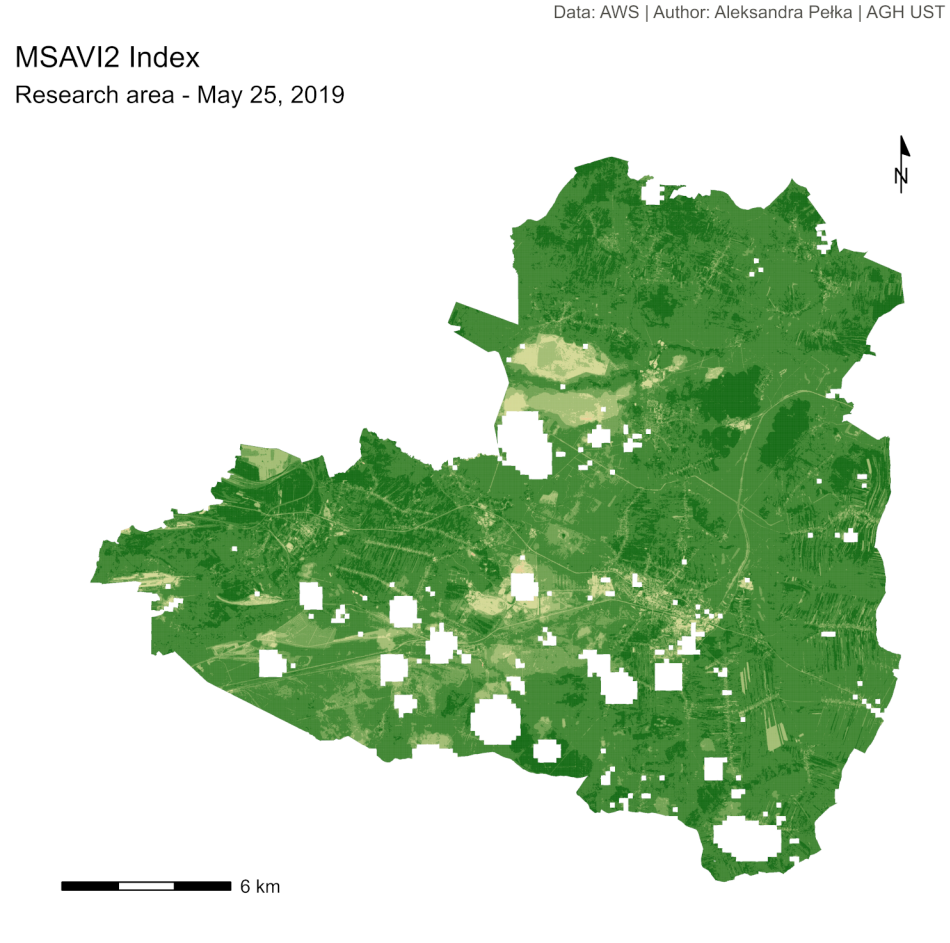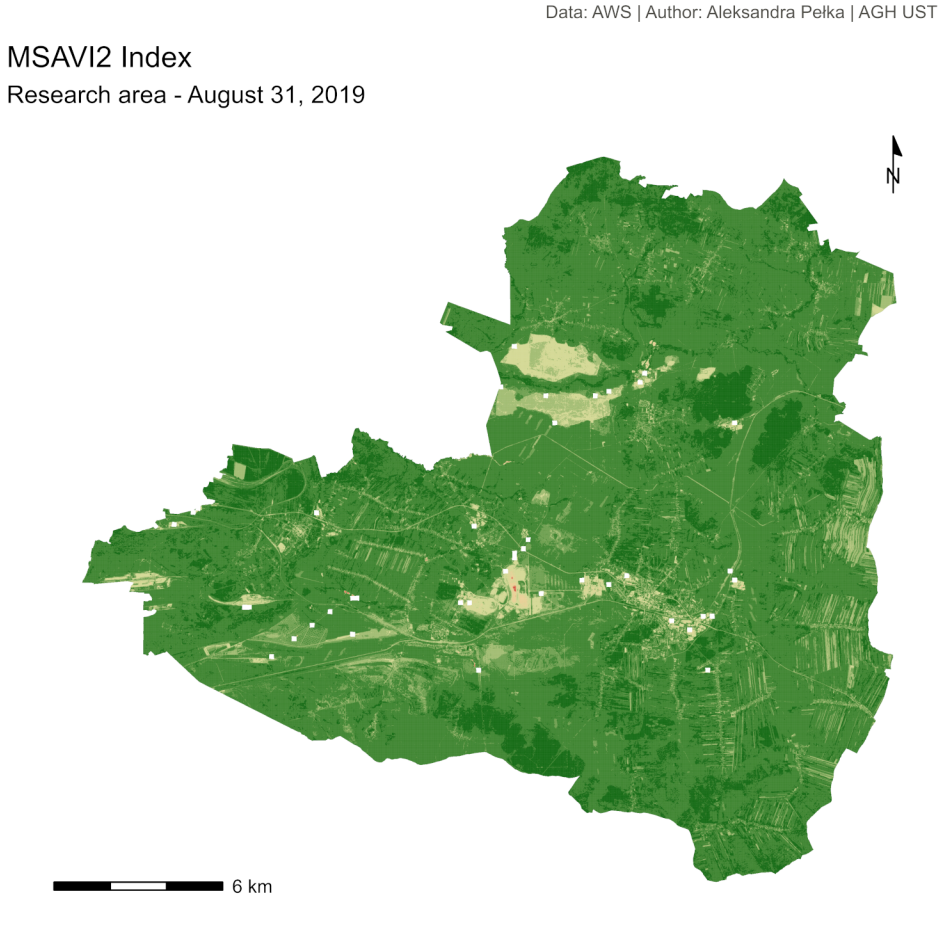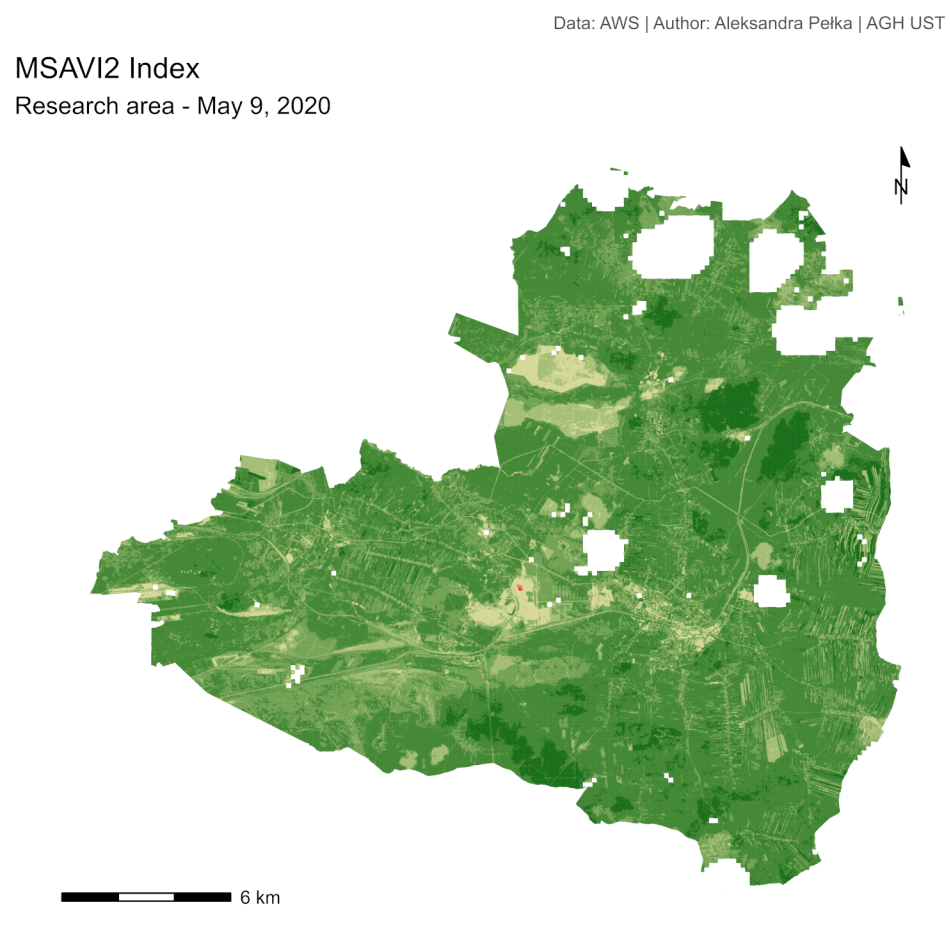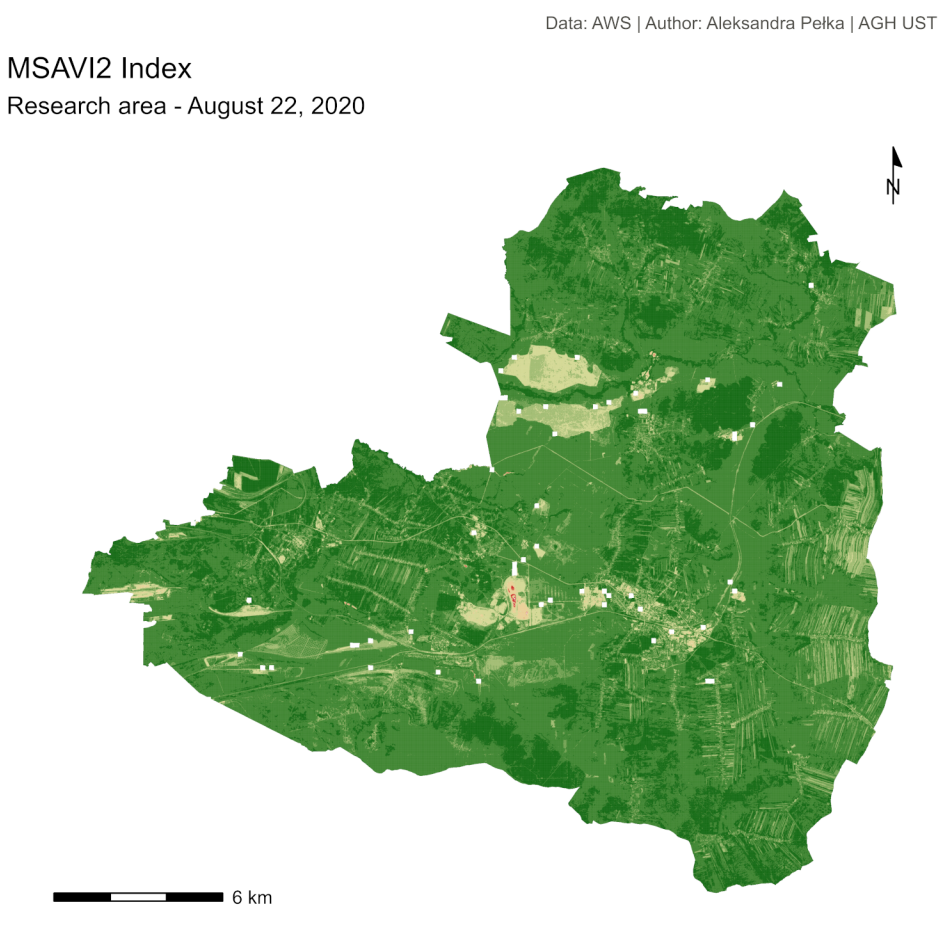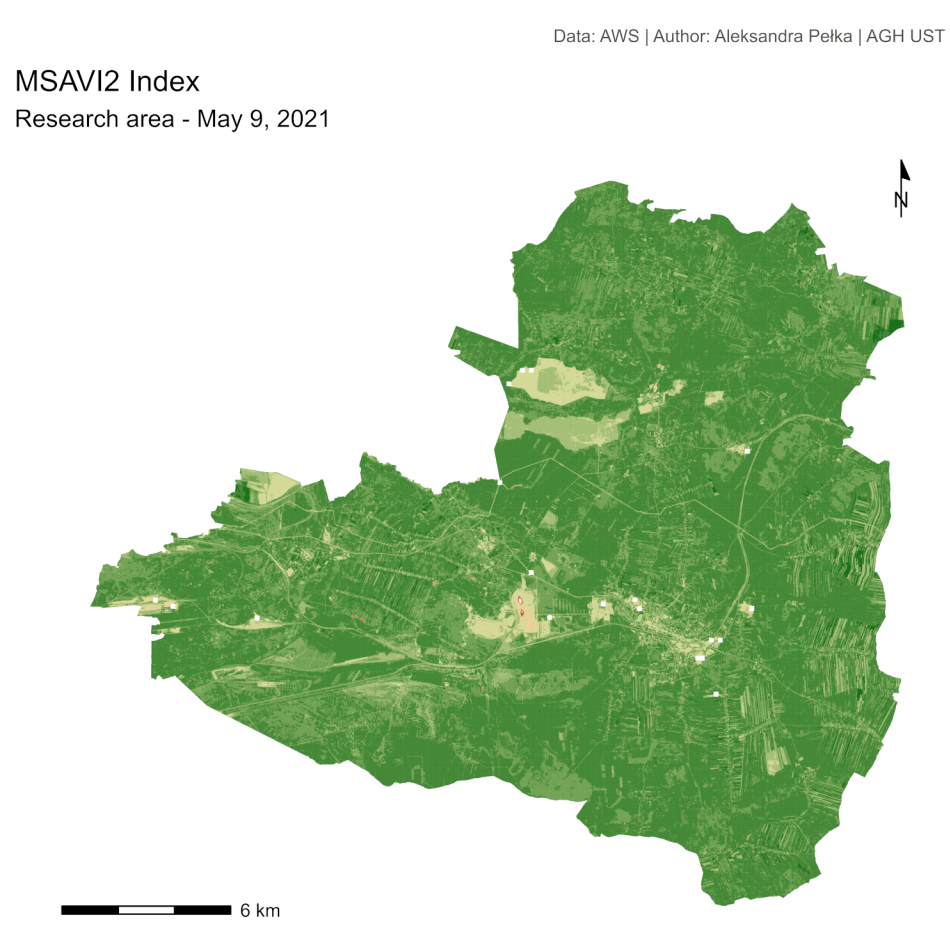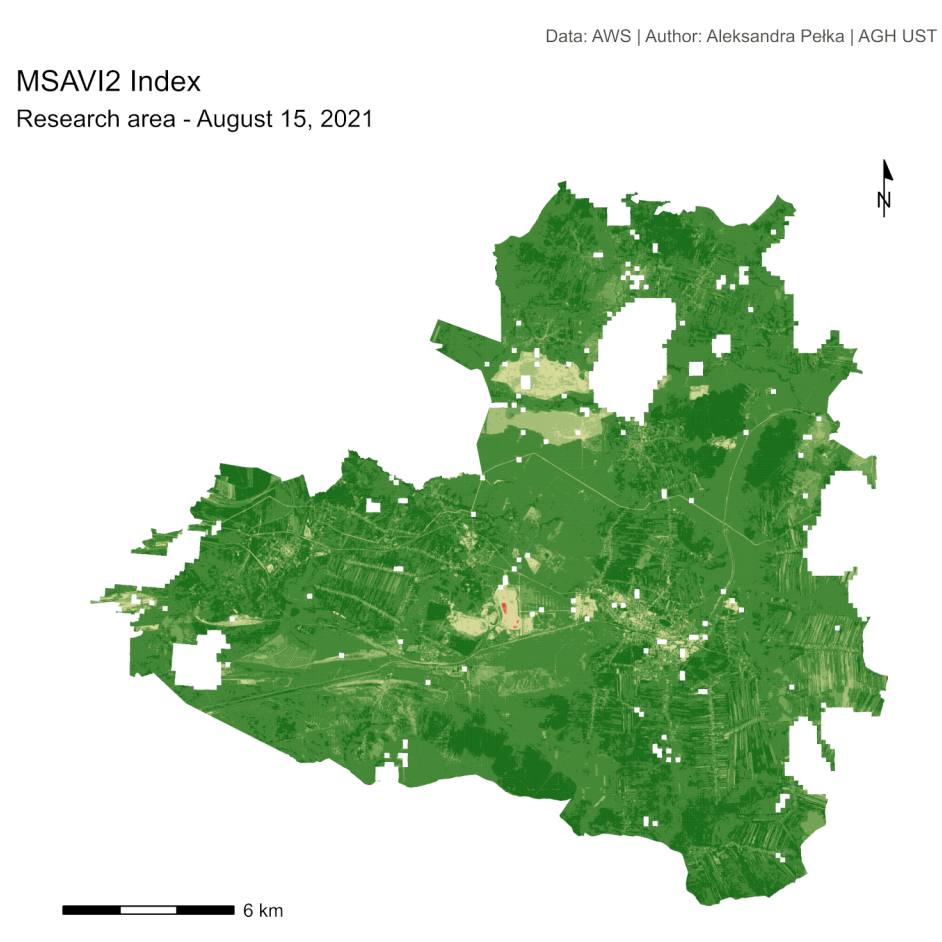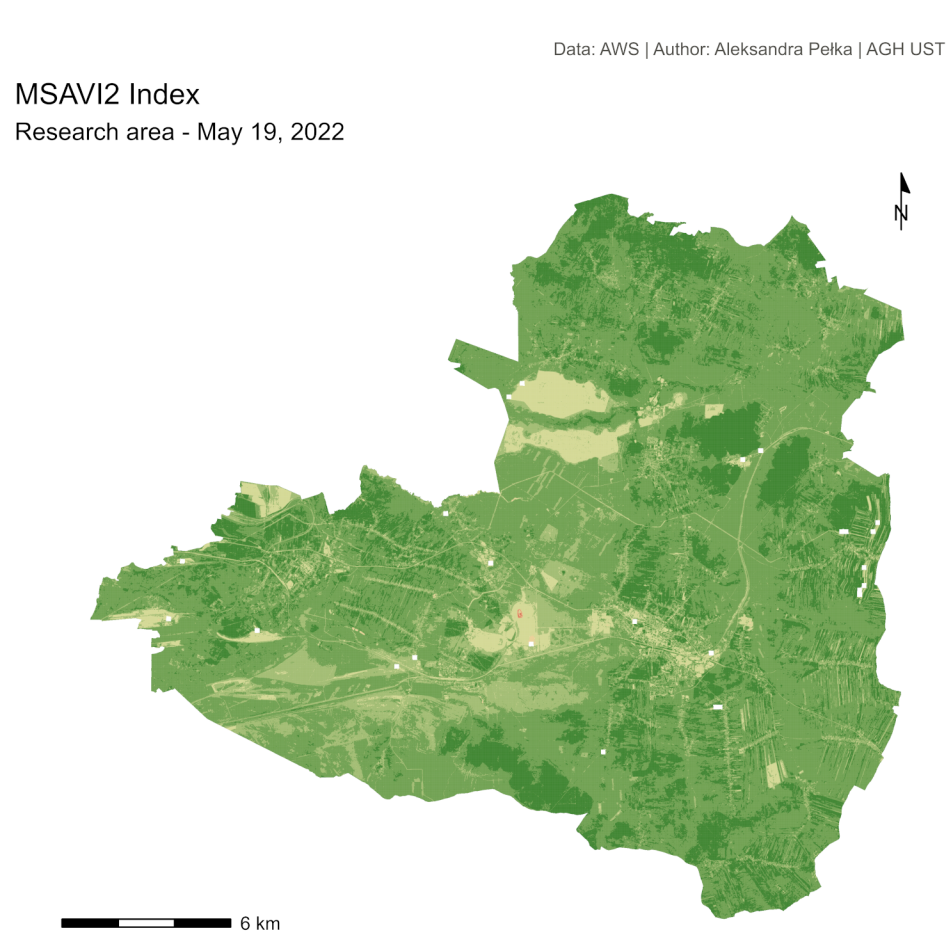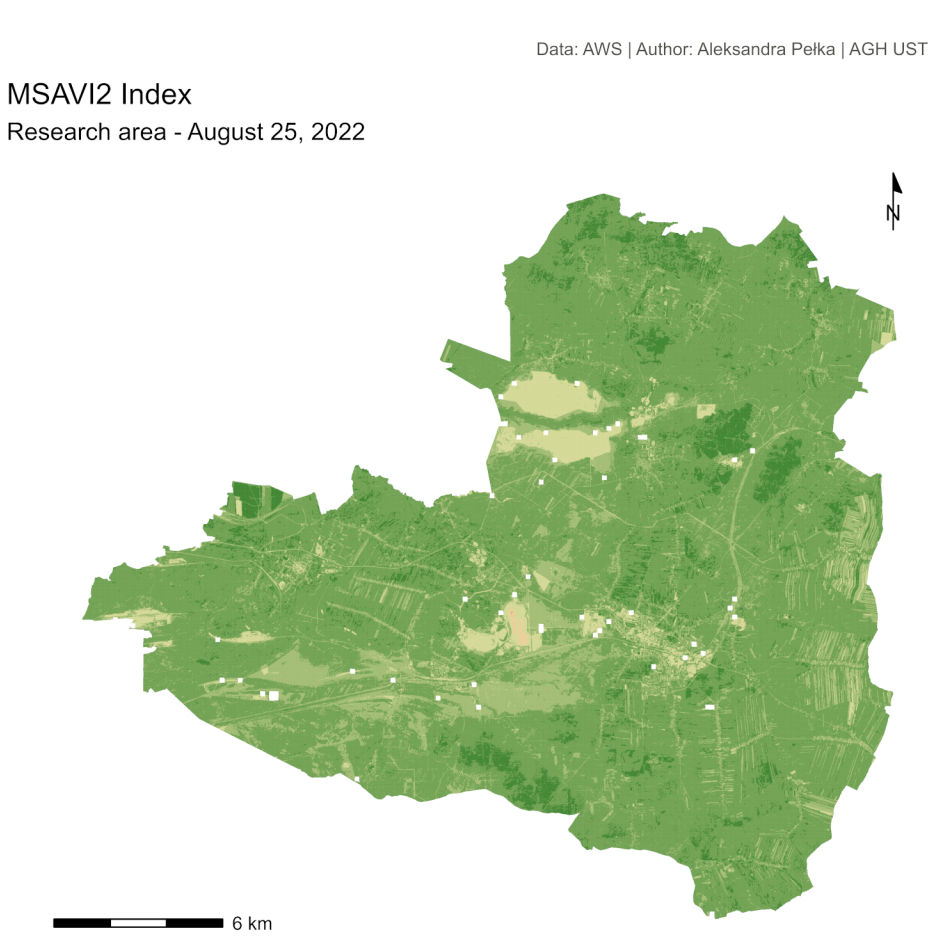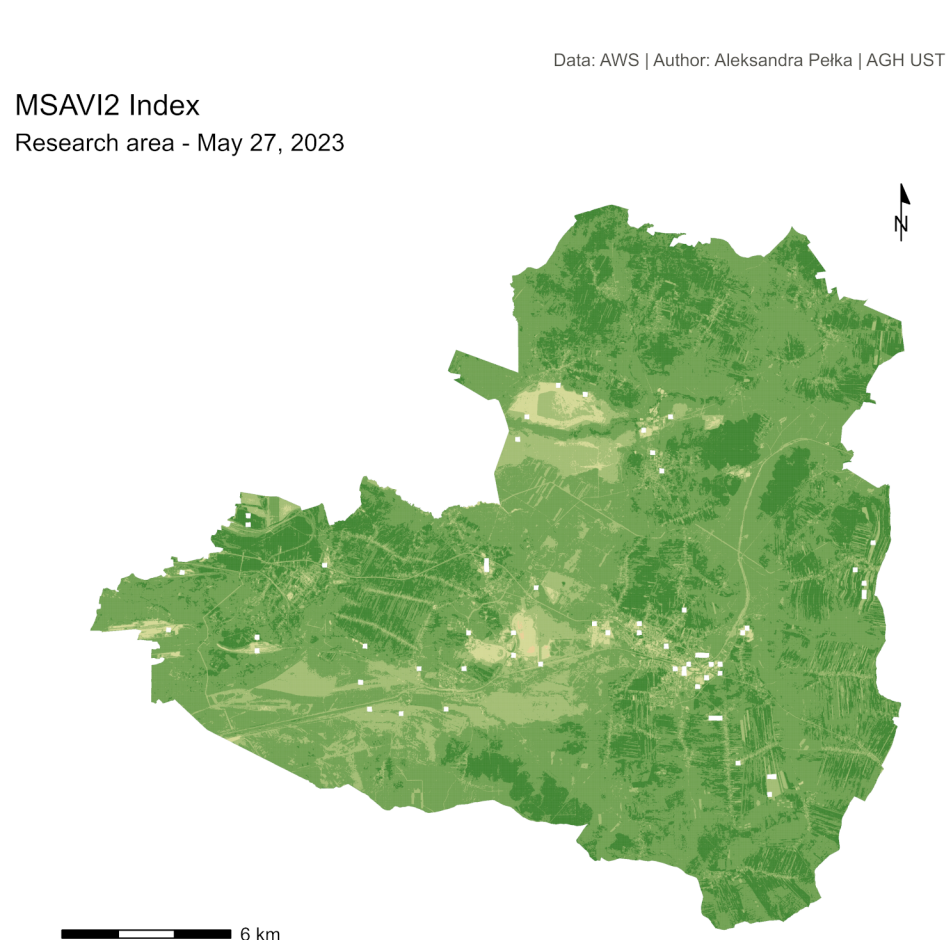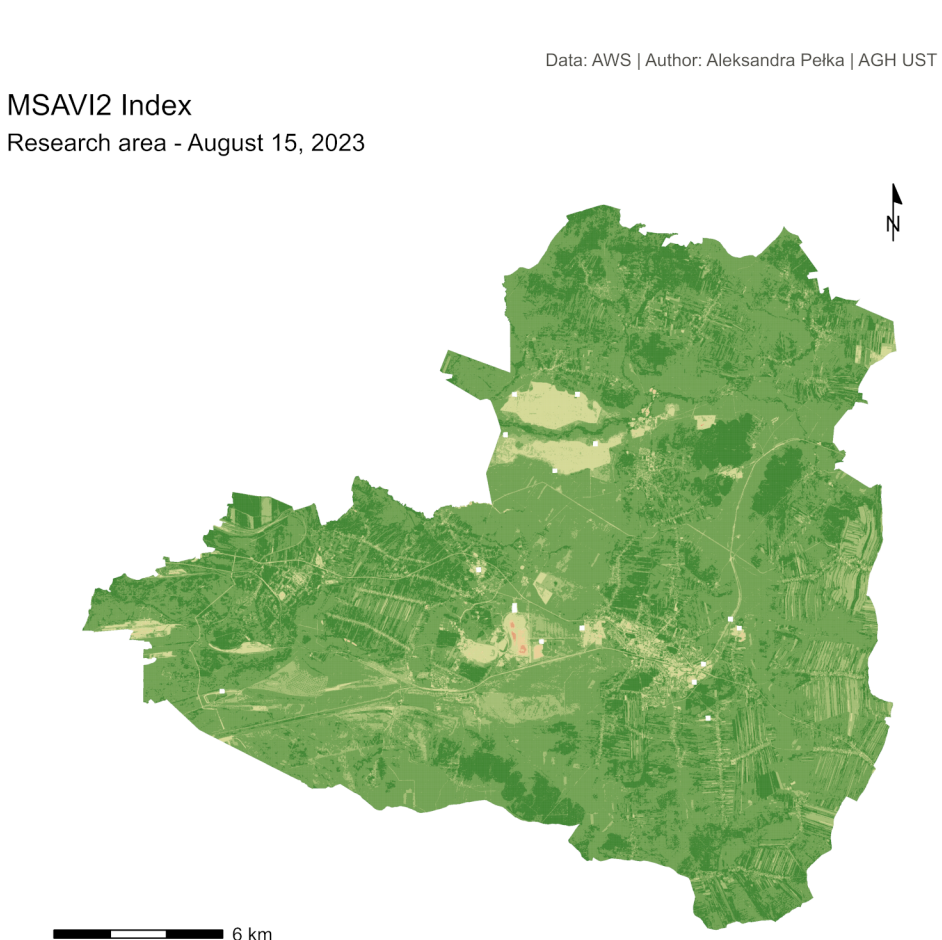

Supplement: s1 [file s1]

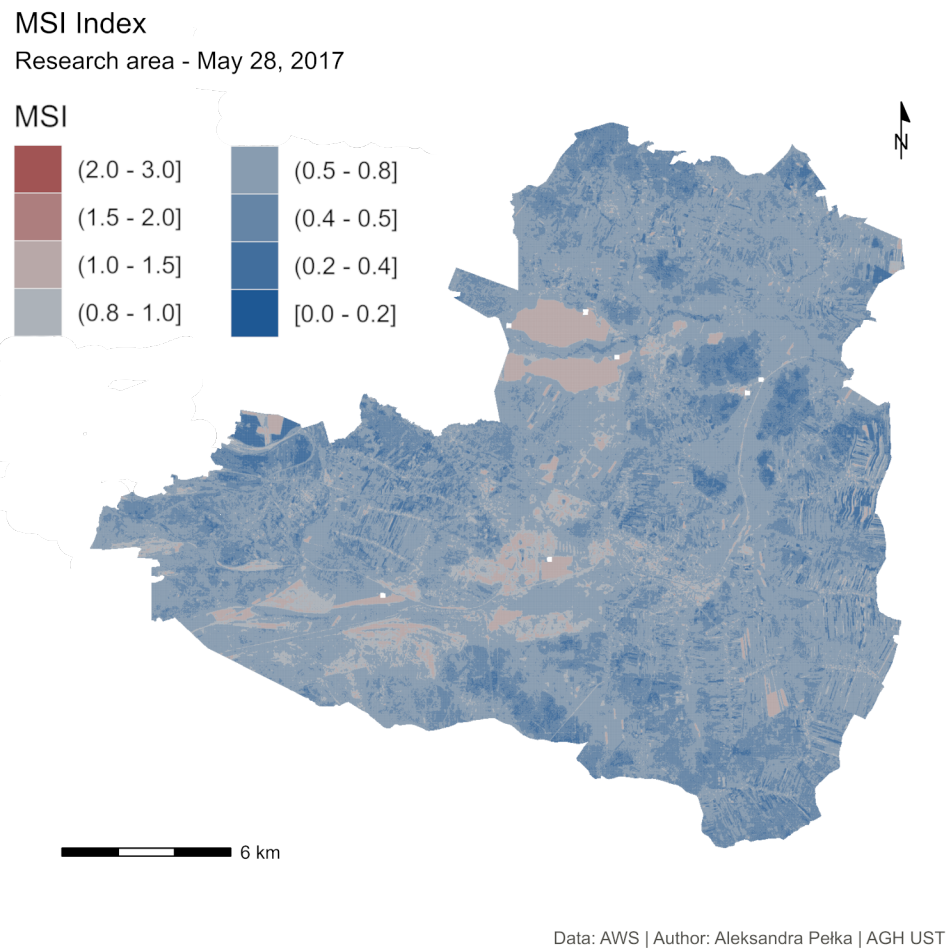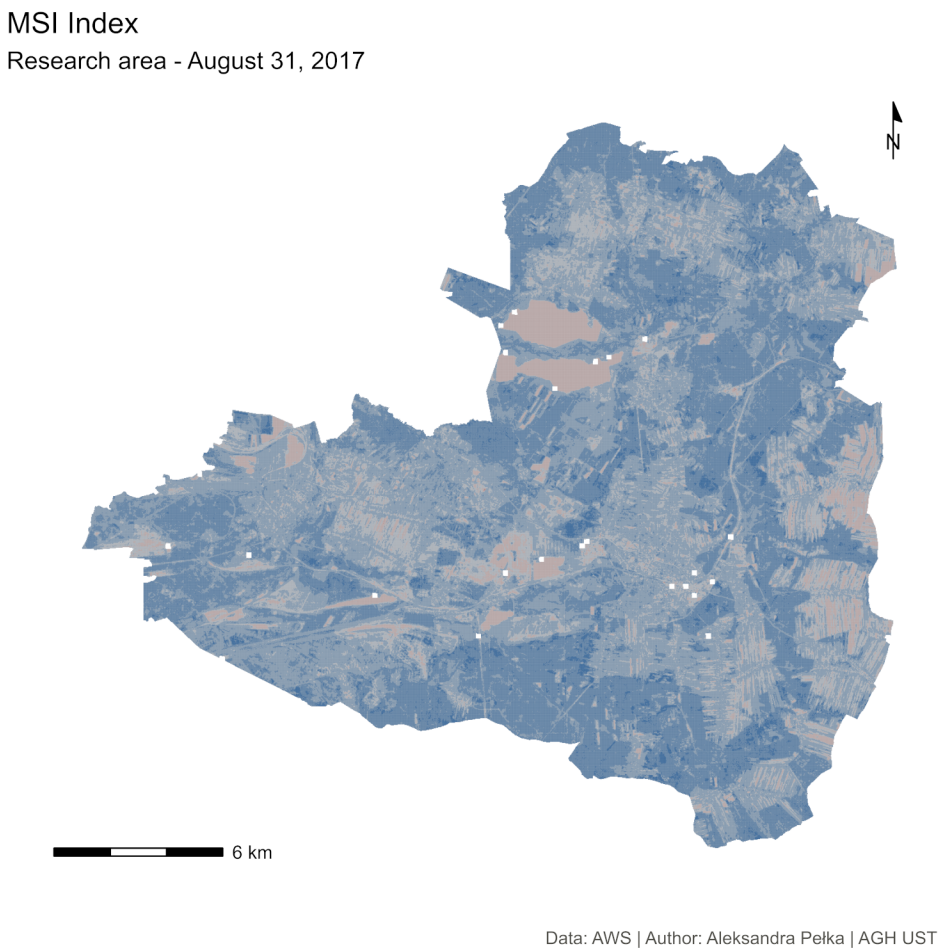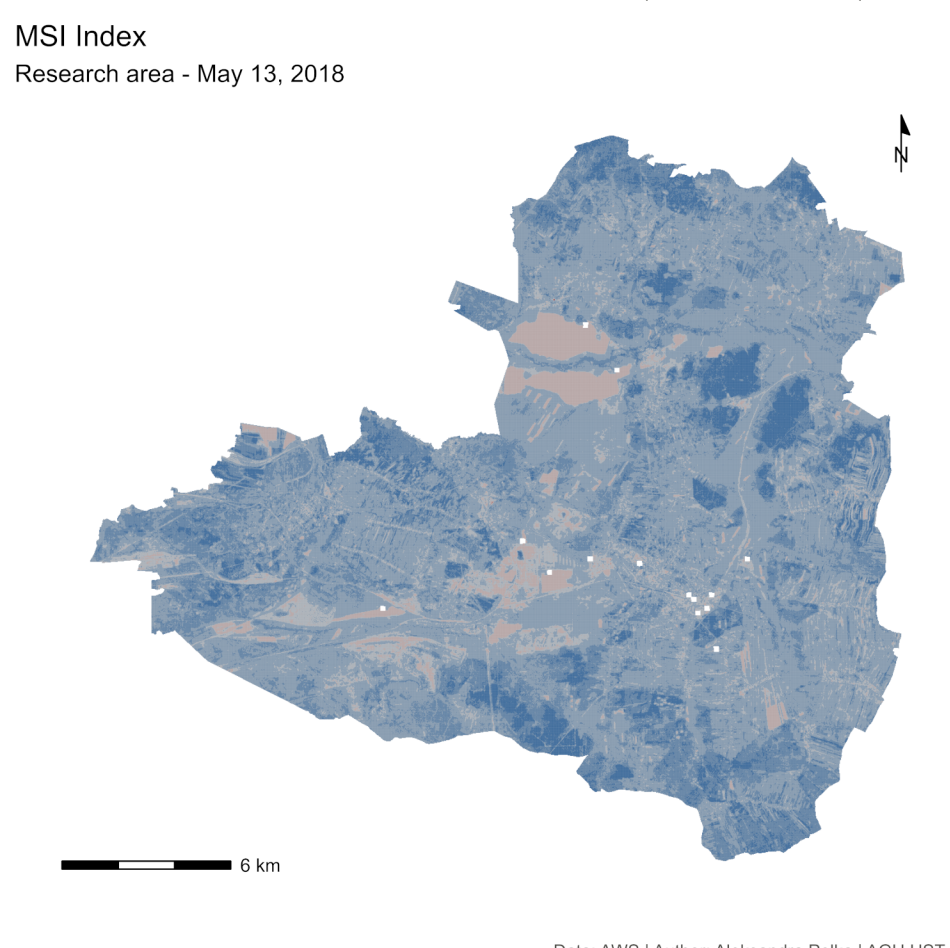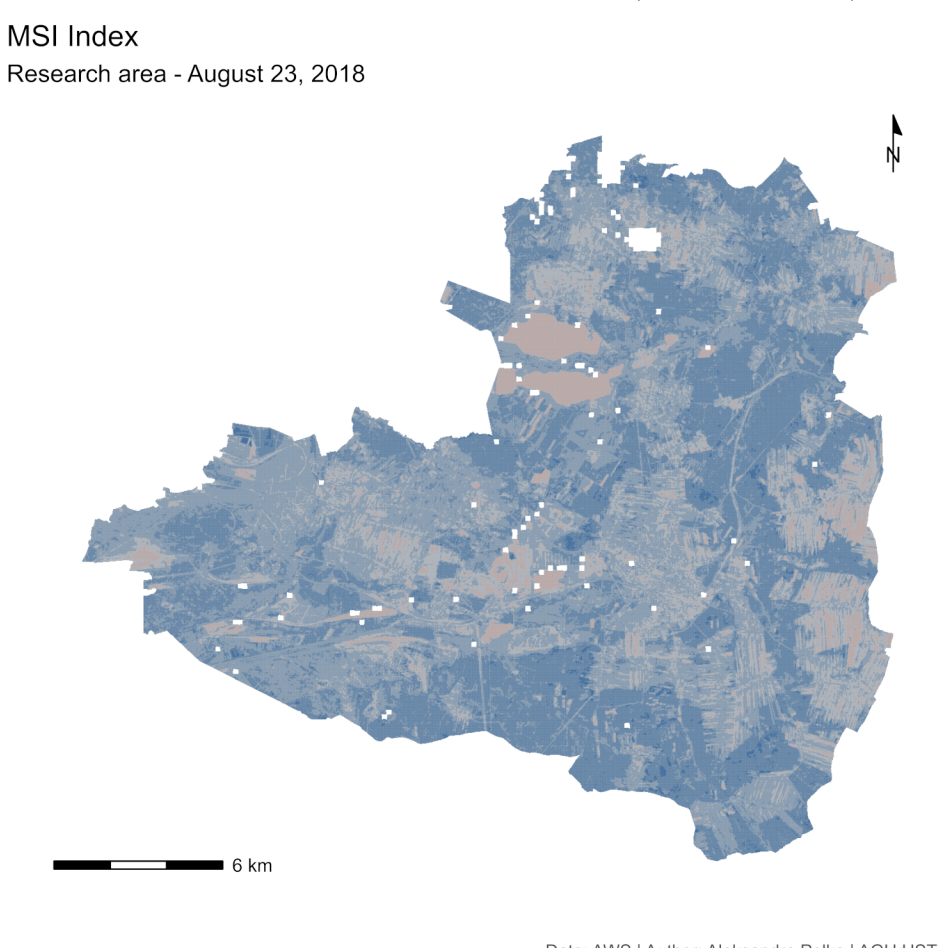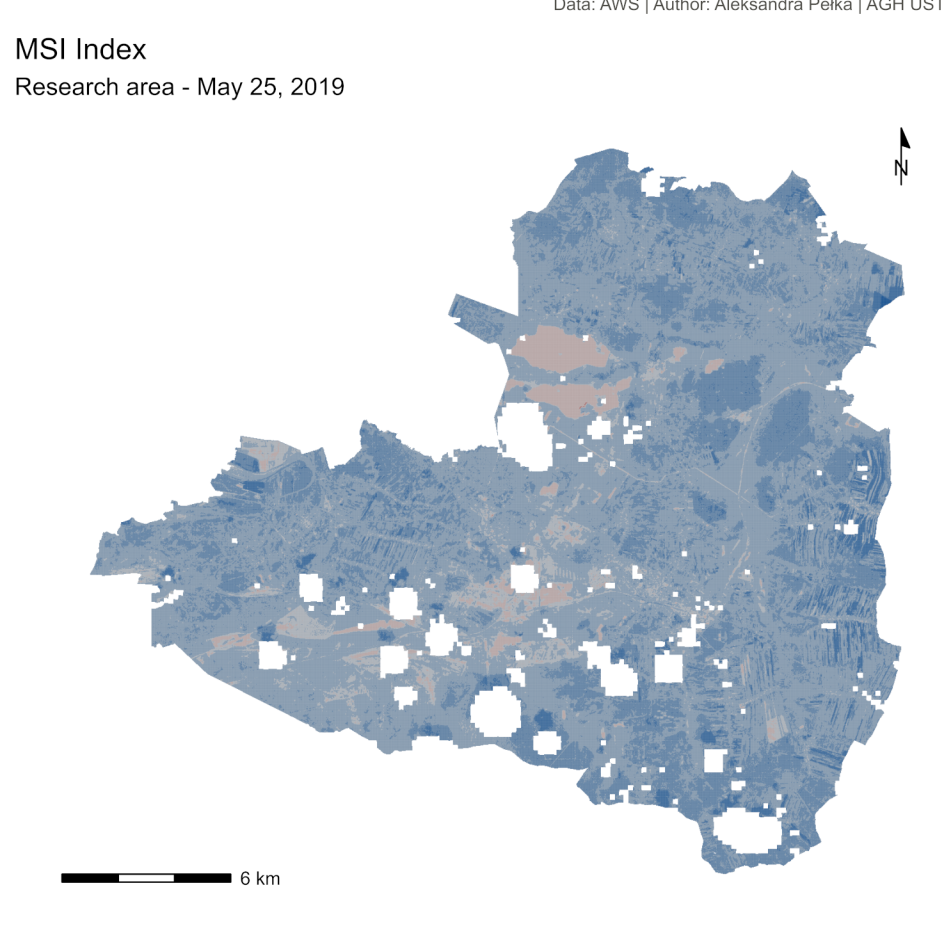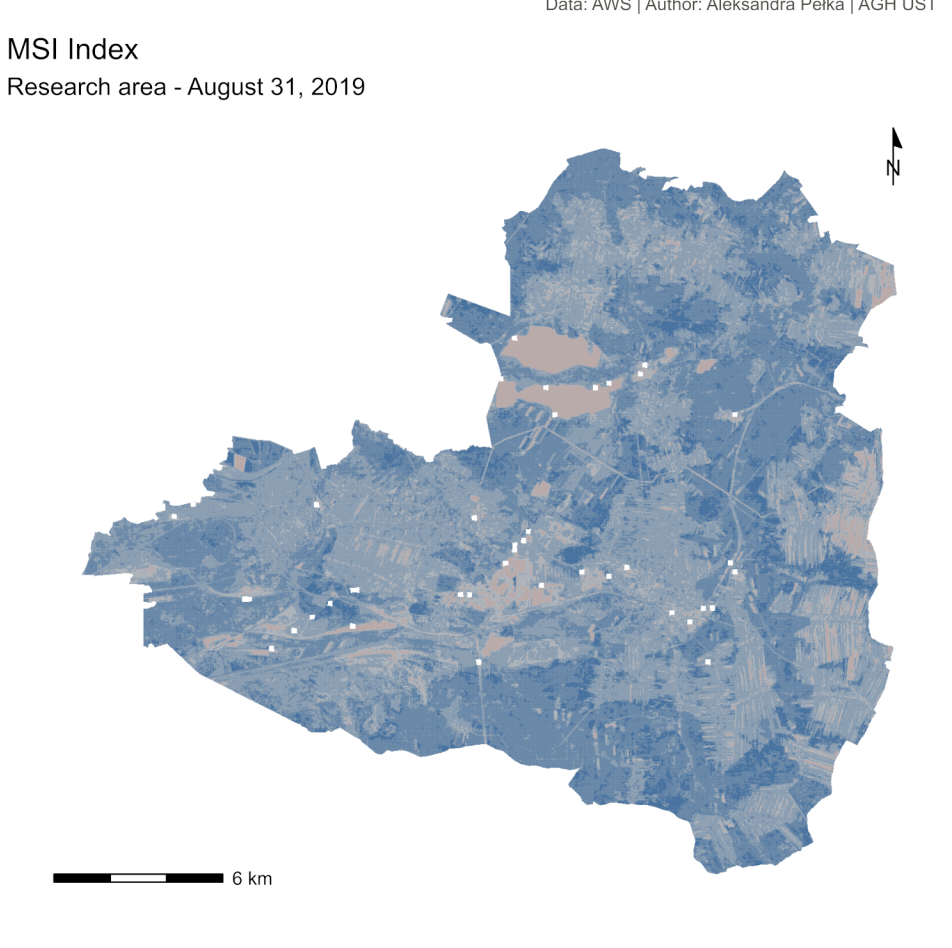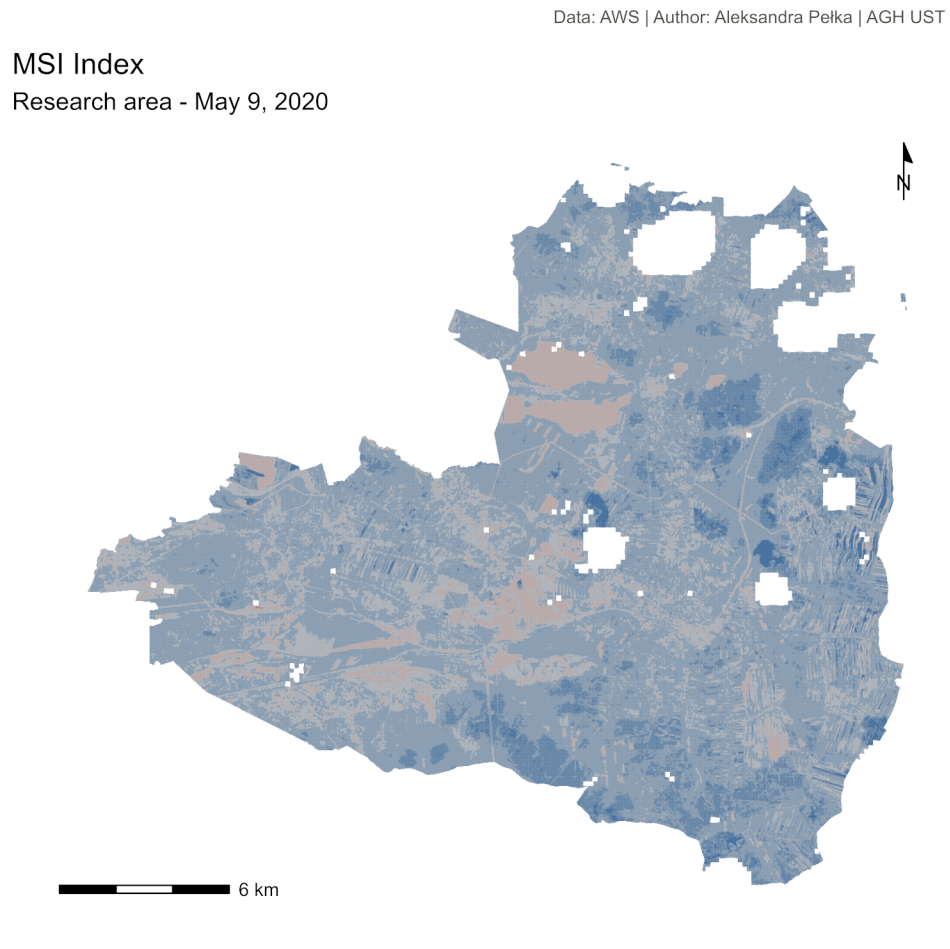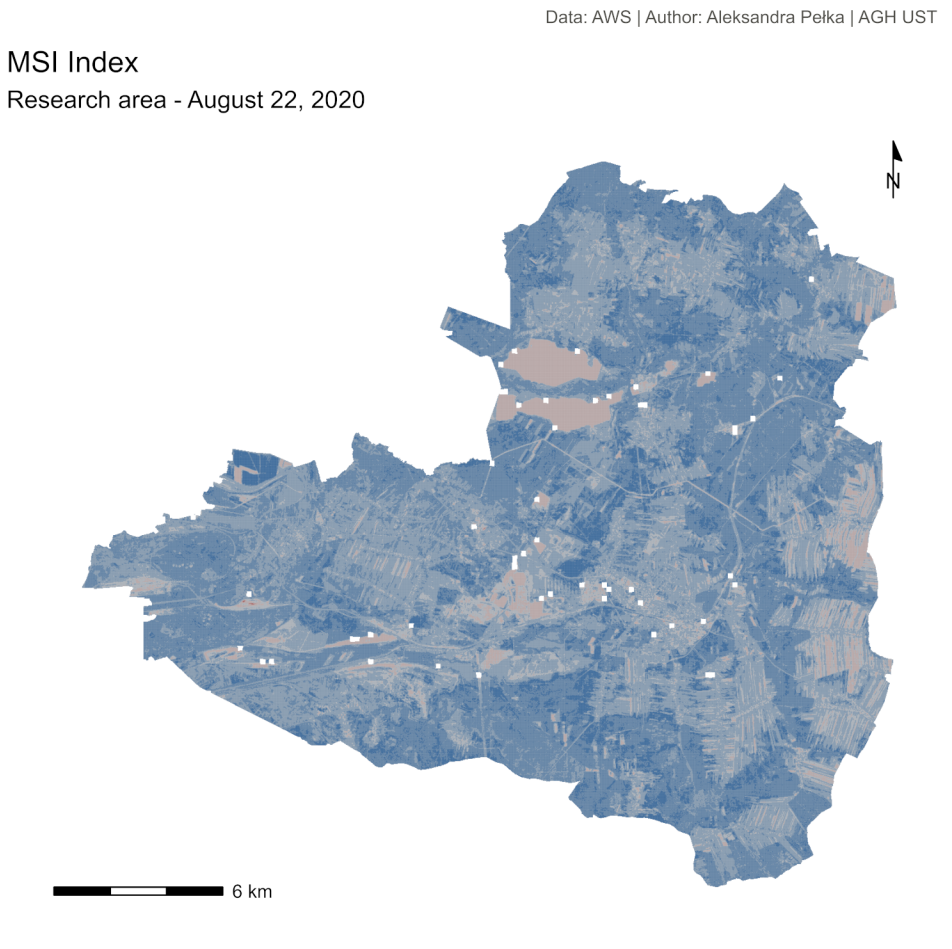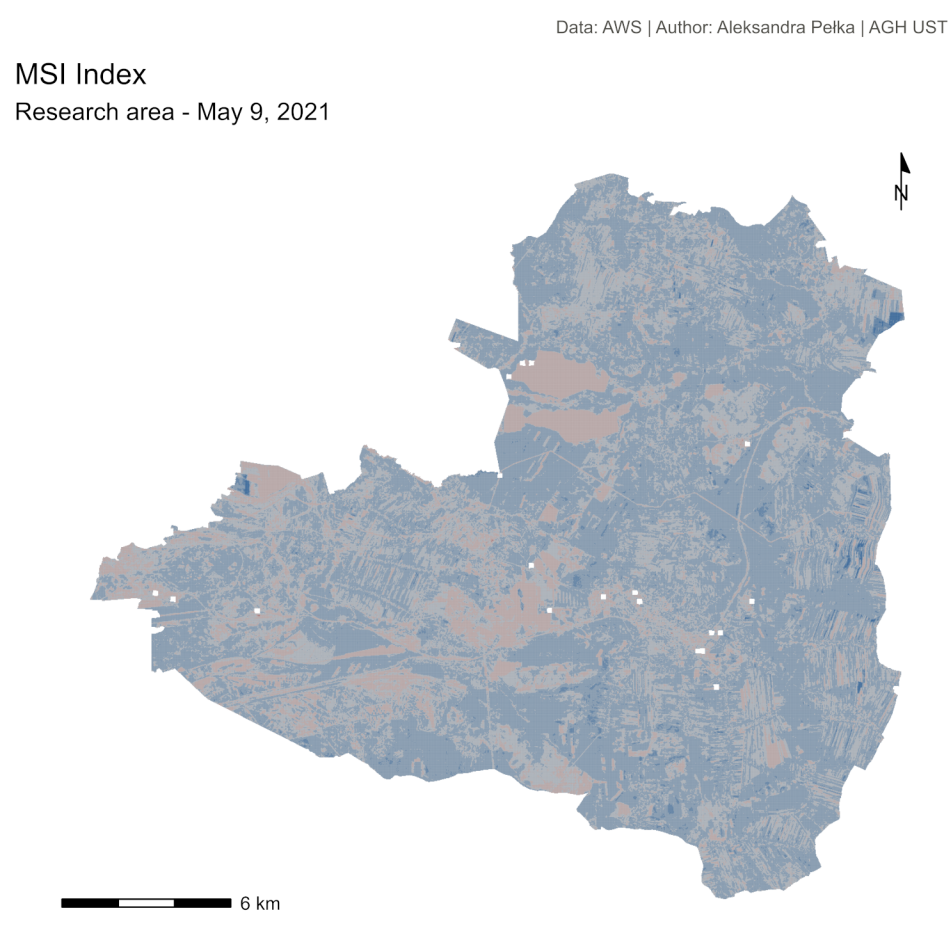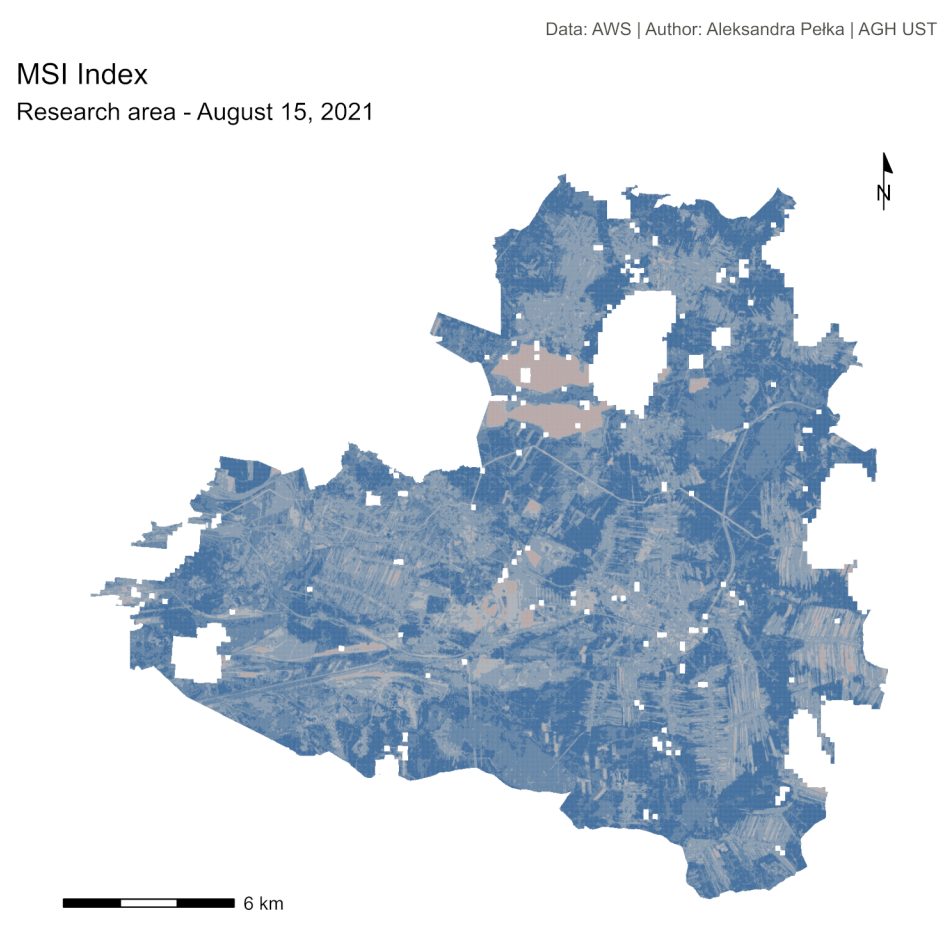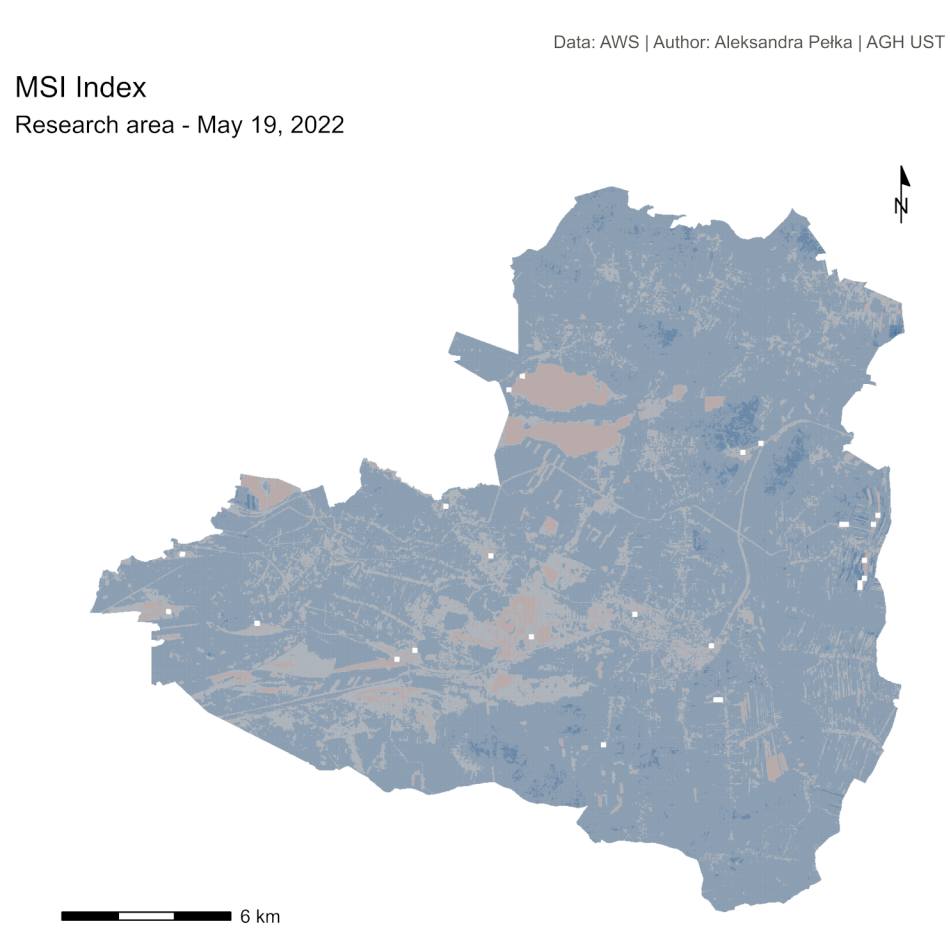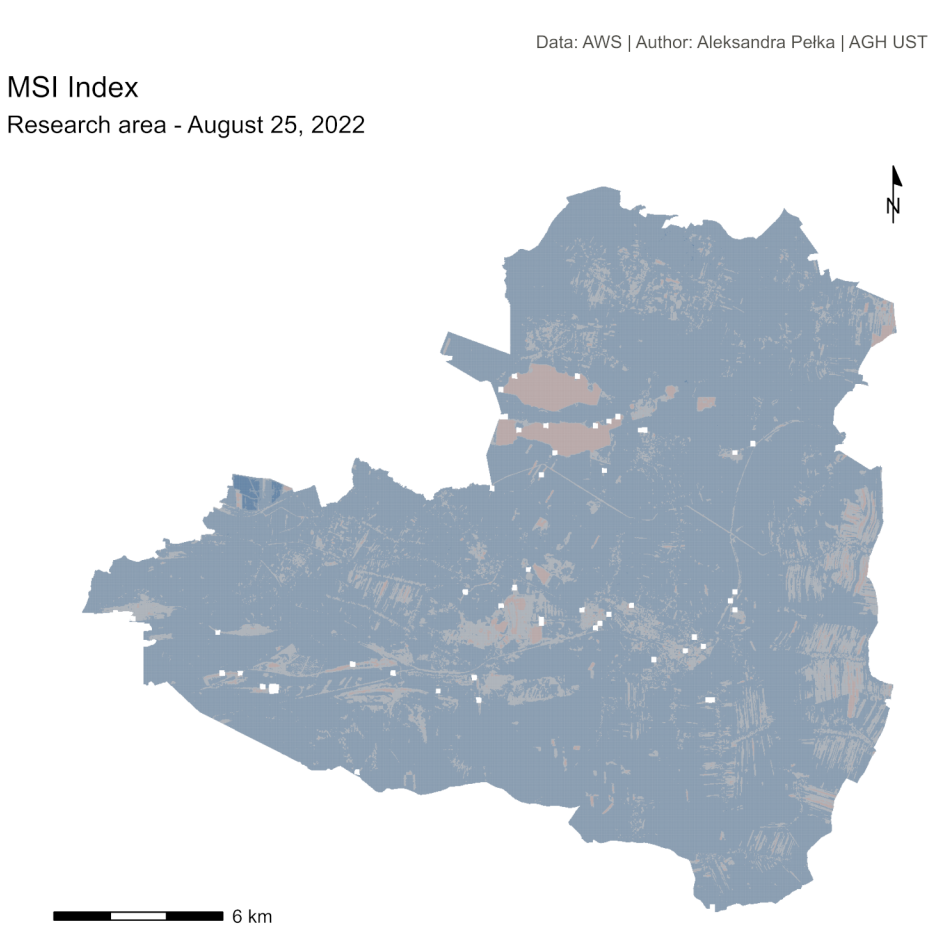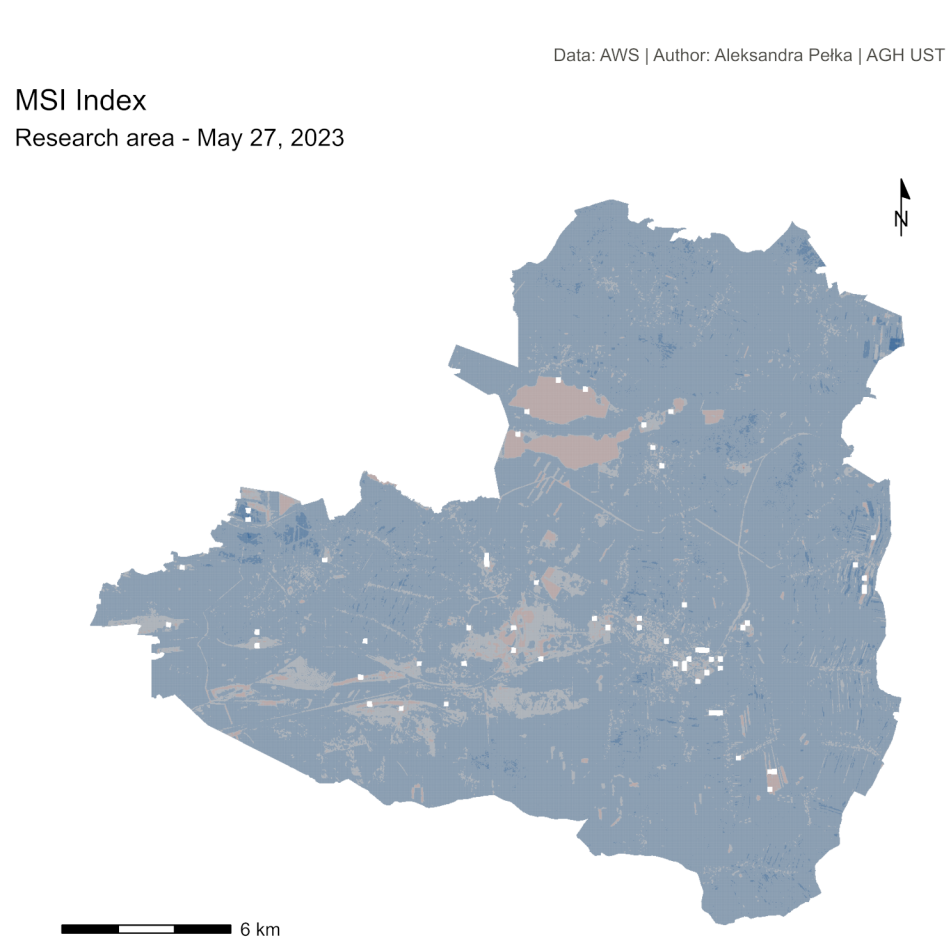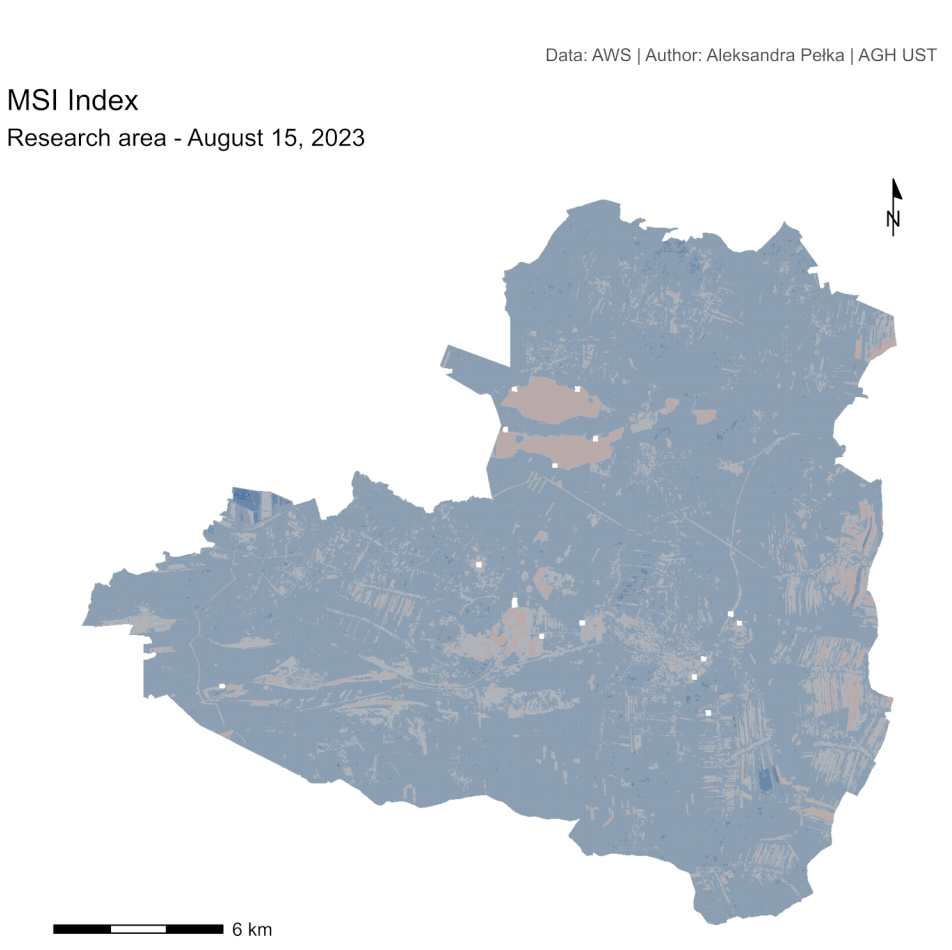

Supplement: s1 [file s1]
